1 **Modulation of *Prdm9*-controlled meiotic chromosome asynapsis overrides**  
2 **hybrid sterility in mice**

3

4 Sona Gregorova<sup>1,§</sup>, Vaclav Gergelits<sup>1,§</sup>, Irena Chvatalova<sup>1,3</sup>, Tanmoy

5 Bhattacharyya<sup>1,4</sup>, Barbora Valiskova<sup>1,2</sup>, Vladana Fotopulsova<sup>1</sup>, Petr Jansa<sup>1</sup>, Diana

6 Wiatrowska<sup>1</sup>, Jiri Forejt<sup>1¶</sup>

7

8 <sup>1</sup>Institute of Molecular Genetics, Academy of Sciences of the Czech Republic,

9 Division BIOCEV, Průmyslová 595, 252 50 Vestec, Czech Republic; <sup>2</sup>Charles

10 University, Faculty of Science, Albertov 2038/6, 128 00, Prague 10, Czech Republic.

11

12 Present address: <sup>3</sup>The National Institute of Public Health, Šrobárova 48, 100 42,

13 Prague 10, Czech Republic; <sup>4</sup>The Jackson Laboratory, 600 Main Street | Bar Harbor,

14 ME 04609, USA

15

16 <sup>§</sup>These authors contributed equally to this work

## 17 **Abstract**

18 The infertility of hybrids between closely related species is one of the reproductive  
19 isolation mechanisms leading to speciation. *Prdm9*, the only known vertebrate hybrid  
20 sterility gene causes failure of meiotic chromosome synapsis and infertility in male  
21 hybrids between mouse strains derived from two mouse subspecies. Within species  
22 *Prdm9* determines the sites of programmed DNA double-strand breaks and meiotic  
23 recombination hotspots. To investigate the relation between *Prdm9*-controlled meiotic  
24 arrest and asynapsis, we inserted random stretches of consubspecific homology on  
25 several autosomal pairs in sterile hybrids and analyzed their ability to form  
26 synaptonemal complexes and rescue male fertility. Twenty-seven or more Mb of  
27 consubspecific homology fully restored synapsis in a given autosomal pair and we  
28 predicted that two symmetric DSBs or more per chromosome are necessary for  
29 successful meiosis. We hypothesize that impaired recombination between  
30 evolutionary diverged homologous chromosomes could function as one of the  
31 mechanisms of hybrid sterility occurring in various sexually reproducing species.

32

### 33 **Acknowledgments**

34 We thank Simon Myers for sharing his unpublished data and critical comments, Attila  
35 Tóth for providing the HORMAD2 antibody, Mary Ann Handel and Linda Odenthal-  
36 Hesse for critical reading of this manuscript, David Green, Sarka Takacova, and  
37 members of the Forejt lab for their helpful comments, M. Capek for help with analysis  
38 of confocal microscopy data, and J. Perlova for her assistance with genotyping. This  
39 work was supported by Czech Science Foundation grant 13-08078S and by the  
40 LQ1604 project of the NSP II from the Ministry of Education, Youth and Sports of the  
41 Czech Republic. Barbora Valiskova was partly supported by project GA UK  
42 No.17115 from Charles University, Czech Republic. We also acknowledge the Light  
43 Microscopy Core Facility, IMG ASCR, Prague, supported by MEYS (LM2015062),  
44 OPVK (CZ.2.16/3.1.00/21547) and (LO1419).

45

## 46 Introduction

47 Hybrid sterility (HS) is a postzygotic reproductive isolation mechanism that  
48 safeguards speciation by restricting gene flow between related taxa. HS is a  
49 universal phenomenon observed in many eukaryotic inter-species hybrids, including  
50 yeast, plants, insects, birds, and mammals (COYNE and ORR 2004; MAHESHWARI and  
51 BARBASH 2010). In the early days of genetics, HS had been difficult to accommodate  
52 in Darwin's theory of evolution by natural selection until the Bateson - Dobzhansky -  
53 Muller incompatibility (BDMI) hypothesis (MULLER and PONTECORVO 1942;  
54 DOBZHANSKY 1951; ORR 1996) explicated HS and, more generally, any hybrid  
55 incompatibility, as a consequence of the independent divergence of mutually  
56 interacting genes and resulting aberrant interaction of the new alleles, previously not  
57 tested by natural selection. HS has several common features across various sexually  
58 reproducing eukaryotic species. Haldane's rule posits that if one sex of the F1  
59 offspring of two different animal races is absent, rare, or sterile, it is the  
60 heterogametic sex (XY or ZW) (HALDANE 1922). Another common feature refers to  
61 the disproportionately large role of Chr X compared to autosomes in reproductive  
62 isolation (PRESGRAVES 2008). More recently, interaction between selfish genomic  
63 elements causing meiotic drive and their suppressors has been implicated in some  
64 instances of reproductive isolation (ORR 2005; ZHANG *et al.* 2015)

65 The molecular mechanisms underlying HS remain an unresolved question.  
66 Historically, genic and chromosomal mechanisms of HS were hypothesized, but the  
67 latter were soon dismissed as unlikely on the grounds that large chromosomal  
68 rearrangements do not segregate with HS genetic factors (DOBZHANSKY 1951). Other  
69 possible forms of non-genic chromosomal HS were not considered because of the

70 limited knowledge of the carrier of genetic information at the time. Thus, for the last  
71 80 years or so, the focus on the genic control of HS prevailed (DOBZHANSKY 1951;  
72 ORR 1996; FORSDYKE 2017). In studies mapping HS genes, the *Drosophila* group of  
73 species has been the model of choice, yet only five *Drosophila* HS genes, namely  
74 *OdsH*, *JYAlpha*, *Ovd*, *agt*, and *Taf1*, have been identified so far, none of which has a  
75 known interacting gene predicted by the BDML hypothesis (TING *et al.* 1998; MASLY *et*  
76 *al.* 2006; PHADNIS and ORR 2009). The low success rate of the positional cloning of  
77 HS genes was explained by the oligogenic or polygenic nature of HS phenotypes and  
78 by the inherent difficulty in genetically dissecting the phenotype that prevents its own  
79 transfer to progeny.

80 Over forty years ago, we introduced the house mouse (*Mus musculus*) as a  
81 mammalian model for the genetic analysis of HS. The first HS locus *Hst1* was  
82 genetically mapped in crosses of laboratory inbred strains (predominantly of *Mus*  
83 *musculus domesticus* (*Mmd*) origin) with wild *Mus musculus musculus* (*Mmm*) mice  
84 (FOREJT and IVANYI 1974). Later, we developed PWD/Ph and PWK/Ph inbred strains  
85 purely from the wild *Mmm* mice of Central Bohemia (GREGOROVA and FOREJT 2000)  
86 and used them in the positional cloning of *Hst1* by high-resolution genetic crosses  
87 and physical mapping (GREGOROVA *et al.* 1996; TRACHTULEC *et al.* 1997). Finally, we  
88 identified the *Hst1* locus with the PR domain containing 9 gene (*Prdm9*) (MIHOLA *et al.*  
89 2009), coding for histone H3 lysine 4/lysine 36 methyltransferase (POWERS *et al.*  
90 2016) the first and still the only HS gene known in vertebrates. Most of the tested  
91 laboratory inbred strains share either the *Prdm9*<sup>Dom2</sup> or *Prdm9*<sup>Dom3</sup> allele. (PARVANOV  
92 *et al.* 2010; BRUNSCHWIG *et al.* 2012). The former allele was found in inbred strains  
93 producing sterile male hybrids when crossed with PWD females, while the *Prdm9*<sup>Dom3</sup>

94 was observed in the strains that yielded quasi-fertile males in the same type of inter-  
95 subspecific crosses (FOREJT *et al.* 2012).

96 The male sterility of (PWD x C57BL/6)F1 (henceforth PB6F1) hybrids depends on the  
97 interaction of the heterozygous allelic combination  $Prdm9^{Msc}/Prdm9^{Dom2}$  with the  
98 PWD allelic form of the X-linked Hybrid sterility X chromosome 2,  $Hstx2^{Msc}$  locus  
99 (DZUR-GEJDOSOVA *et al.* 2012; BHATTACHARYYA *et al.* 2014). For the sake of clarity  
100 and to stress the origin of the alleles we will use  $Prdm9^{PWD}$ ,  $Prdm9^{B6}$  and  $Hstx2^{PWD}$  in  
101 the rest of this paper. Any other tested allelic combination of these two major HS  
102 genes yields fully fertile or subfertile male hybrids (DZUR-GEJDOSOVA *et al.* 2012;  
103 FLACHS *et al.* 2012). The proper allelic combination of  $Prdm9$  and  $Hstx2$  genes is  
104 necessary but not sufficient to completely govern HS because less than 10% instead  
105 of expected 25% of (PWD x B6) x B6 male backcross progeny replicated the infertility  
106 of male PB6F1 hybrids (DZUR-GEJDOSOVA *et al.* 2012). Initially, we explained this  
107 'missing heritability' by assuming additional genic interaction of three or more  
108 additional HS genes with a small effect that escaped the genetic screen (DZUR-  
109 GEJDOSOVA *et al.* 2012). However, an alternative, non-genic explanation emerged  
110 from the analysis of meiotic phenotypes of sterile hybrids. The failure of multiple  
111 autosomal pairs to synapse properly, the persistence of phosphorylated histone  
112  $\gamma$ H2AX indicating unrepaired DNA double-strand breaks (DSBs) on unsynapsed  
113 chromosomes, and the disturbed transcriptional inactivation of sex chromosomes at  
114 the first meiotic prophase were the most prominent features observed in  
115 approximately 90% of primary spermatocytes of infertile PB6F1 inter-subspecific  
116 hybrids (BHATTACHARYYA *et al.* 2013; BHATTACHARYYA *et al.* 2014). We suggested that  
117 the failure of chromosomes to synapse could be related to their fast-evolving  
118 nongenic DNA divergence. Because failure of proper synapsis in pachytene

119 spermatocytes is known to interfere with the normal progression of the first meiotic  
120 division (MAHADEVAIAH *et al.* 2008; BURGOYNE *et al.* 2009), we assumed that the  
121 asynapsis could be the ultimate cause of the sterility of male hybrids. Recently, the  
122 role of PRDM9 zinc finger domain binding sites within noncoding genomic DNA has  
123 been demonstrated in PB6F1 male HS. Replacement of the mouse sequence  
124 encoding the PRDM9 zinc-finger array with the orthologous human sequence  
125 reversed sterility in (PWD x B6-*Prdm9*<sup>Hu</sup>)F1 hybrid males (DAVIES *et al.* 2016). In  
126 PB6F1 hybrids, roughly 70% of *Prdm9*-directed DSBs hotspots identified by the  
127 DMC1 ChIP-seq method were enriched on the 'nonself' homologous chromosome,  
128 since the DSBs determined by the B6 allele of *Prdm9* were found predominantly or  
129 exclusively on PWD chromosomes, and *vice versa*. Such hotspots were designated  
130 as asymmetric DSB hotspots. Chromosome-specific quantification of asymmetry  
131 correlated well with the asynapsis rate across five arbitrarily chosen chromosomes of  
132 PB6F1 hybrids (DAVIES *et al.* 2016; SMAGULOVA *et al.* 2016). Another, non-exclusive  
133 interpretation of DMC1 ChIP-seq data pointed to significant enrichment of PRDM9-  
134 independent hotspots in the PB6F1 hybrid testis, which occurs in promoters and  
135 other regulatory motifs and which is characteristic of spermatogenic arrest in *Prdm9*  
136 knockout males (SMAGULOVA *et al.* 2016). Recently, one third of PRDM9-dependent  
137 DSBs was reported within sequences that have at least some repetitive character  
138 and indicating that inappropriately high DSB levels in retroposons and other repetitive  
139 elements may contribute to the infertility seen in some mouse hybrids (YAMADA *et al.*  
140 2017).

141 In this work, we studied the relationship between meiotic chromosome asynapsis,  
142 intersubspecific heterozygosity and male HS in a series of PB6F1 hybrids carrying  
143 recombinant chromosomes with *Mmm/Mmm* consubspecific (belonging to the same

144 subspecies) PWD/PWD homozygous intervals on *Mmm/Mmd* intersubspecific  
145 (belonging to different subspecies) PWD/B6 heterozygous background. We report  
146 the restoration of synapsis of intersubspecific chromosome pairs in the presence of  
147 27 Mb or more of consubspecific sequence, and the reversal of HS by targeted  
148 suppression of asynapsis in the four most asynapsis-sensitive chromosomes. Thus  
149 the asymmetry of PRDM9 hotspots is linked to failure of synapsis of homologous  
150 chromosomes and to meiotic arrest of sterile hybrid males.

151

## 152 **Results**

### 153 **Small chromosomes are more susceptible to asynapsis in sterile F1 hybrids**

154 First, we ascertained the frequency of meiotic asynapsis separately for each  
155 chromosome pair of PB6F1 hybrid males by combining fluorescence in-situ  
156 hybridization (FISH) to decorate chromatin from individual chromosomes with  
157 immunostaining of the synaptonemal complex protein 3 (SYCP3) a major component  
158 of axial/lateral elements to visualize synaptonemal complexes, and a HORMA  
159 domain-containing protein-2, HORMAD2 (WOJTASZ *et al.* 2012), to identify the axial  
160 elements of unsynapsed chromosomes (*figure supplement 1A*). Altogether 4168  
161 pachynemas from 40 PB6F1 hybrid males were analyzed. All autosomes of hybrid  
162 males displayed a certain degree of asynapsis, classified as complete, partial, or  
163 intermingled, with frequencies ranging from 2.6% (Chr 1) to 42.2% (Chr 19) (*Figure*  
164 *1A - table supplement 1*). A strong bias was evident towards higher asynapsis rates  
165 in the five smallest autosomes ( $P < 5.3 \times 10^{-14}$ , comparison of GLMM models, *Figure*  
166 *1A*). Recently, SPO11 oligos released during the processing of DSBs were



167 sequenced, mapped and quantified at chromosome-wide scale in male mice of the  
168 B6 laboratory inbred strain (LANGE *et al.* 2016). This information, together with the  
169 estimated frequency of asymmetric DSB hotspots in PBF1 hybrids (DAVIES *et al.*  
170 2016; SMAGULOVA *et al.* 2016) enabled us to calculate the possible correlation  
171 between the number of symmetric DSBs per chromosome and synapsis between  
172 intersubspecific homologs. The calculation is based on and limited by the following  
173 premises: (i) the overall densities of DSBs on individual chromosomes of B6 and  
174 PB6F1 hybrid males are similar, (ii) approximately 250 DSBs occur per  
175 leptotene/zygotene cell (KAUPPI *et al.* 2013), and (iii) the 0.28 proportion of symmetric  
176 DSB hotspots in (PWD x B6)F1 hybrid males (DAVIES *et al.* 2016) is constant in all  
177 autosomes. Under these conditions, a strong negative correlation (Spearman's  $\rho = -$   
178 0.76,  $P = 0.0002$ ) of asynapsis rate with symmetric DSB hotspots (LANGE *et al.* 2016)  
179 can be seen (*Figure 1B - table supplement 2*). This correlation is stronger than the  
180 correlation of the asynapsis rate with the chromosomal physical length (Spearman's  
181  $\rho = -0.68$ ,  $P = 0.0013$ ). Importantly, the asynapsis rate cannot be better explained by  
182 the chromosomal length ( $P = 0.709$ , comparison of GLMM models), when it is  
183 controlled for the symmetric DSB hotspots (SPO11 oligos), while it is better explained  
184 by the symmetric DSB hotspots (SPO11 oligos) when controlled for chromosomal  
185 length ( $P = 0.046$ , comparison of GLMM models). Thus our findings indicate that  
186 synapsis of a pair of homologous chromosomes depends on the presence of a  
187 certain minimum number of symmetric DSB hotspots.

### 188 **Asynapsed chromosomes are devoid of active euchromatin**

189 The Cot-1 euchromatin RNA (ecRNA) is localized throughout the active interphase  
190 chromosome territory *in cis* and does not diffuse into the rest of the nucleus like other  
191 types of RNAs. EcRNA is mainly composed of repeat-rich noncoding RNA in active,

192 open euchromatin (HALL *et al.* 2014). Accordingly, we used Cot-1 DNA as a probe for  
193 ecRNA FISH to compare the ecRNA distribution in asynapsed and synapsed  
194 chromosomes. Pachytene spermatocytes of PB6F1 hybrids were examined for  
195 subnuclear localization of active chromatin and asynapsed chromosomes using  
196 confocal fluorescence microscopy after Cot-1 RNA FISH and HORMAD2  
197 immunolabeling. Fluorescence signal quantification revealed that subnuclear regions  
198 of asynapsed chromosomes composed of sex chromosomes and/or autosomal  
199 univalents were lacking active euchromatin in contrast to other regions of the  
200 pachytene nuclei (*Figure supplement 1B - video supplement 1*). We propose that the  
201 absence of active euchromatin is a consequence of the meiotic synapsis failure of  
202 intersubspecific chromosomes, known as meiotic silencing of unsynapsed chromatin  
203 (MSUC (BURGOYNE *et al.* 2009)), which can act as an epigenic component  
204 contributing to the meiotic phenotypes of sterile hybrids. Our findings are in  
205 agreement with the transcriptional under-expression of genes on several autosomes  
206 and disruption of meiotic sex chromosome inactivation (MSCI) in leptotene/zygotene  
207 spermatocytes from semi-sterile *Mmm* x *Mmd* male hybrids with *Prdm9*<sup>PWK/LEWES</sup> and  
208 *Hstx2*<sup>PWK</sup> or *Hstx2*<sup>LEWES</sup> allelic combinations (LARSON *et al.* 2016).

### 209 **The minimal length of consubspecific sequence necessary to rescue meiotic** 210 **chromosome synapsis**

211 We have shown previously that meiotic asynapsis affects intersubspecific (PWD/B6)  
212 but not consubspecific (PWD/PWD) pairs of homologous chromosomes in sterile  
213 male hybrids from crosses of PWD females and B6.PWD-Chr # consomic males  
214 (GREGOROVA *et al.* 2008; BHATTACHARYYA *et al.* 2013). Here, we searched for the  
215 minimum length of the PWD/PWD consubspecific sequence that still could secure  
216 synapsis of a chromosome and potentially restore fertility in the hybrids. Instead of

217 substituting the whole PWD chromosome for its B6 homolog, we generated  
218 recombinant PWD/B6 and B6/PWD (centromere/telomere) chromosomes. To do that,  
219 we crossed the male hybrids between two B6.PWD-Chr# consomic strains and a  
220 PWD female to match the intact maternal PWD homologs and estimated the  
221 minimum size and location of consubspecific PWD/PWD stretches needed for  
222 synapsis rescue as shown in *Figure 2A*. In three such generated 'two-chromosome  
223 crosses' (hereafter 2-chr cross) we investigated the effect of the PWD/PWD  
224 consubspecific intervals on the asynapsis rate in six different chromosomes - two in a  
225 given experiment, namely Chr 5 & Chr 12 (*Figure 2B - table supplement 3 and 4*),  
226 Chr 7 & Chr 15 (*Figure 2B - table supplement 5 and 6*) and Chr 17 & Chr 18 (*Figure*  
227 *2B - table supplement 7 and 8*). Altogether over 12,000 pachynemas from 122  
228 chromosomes were examined. All male progeny of the 2-chr crosses were fully  
229 sterile, with low testis weight and the absence of sperm in the epididymis. The  
230 analysis of data from six recombinant chromosomes revealed the following common  
231 features:

232 - Introduction by recombination of 27 Mb or more of a consubspecific (PWD/PWD)  
233 interval into a pair of intersubspecific (PWD/B6) homologs effectively suppressed the  
234 asynapsis rate below the baseline of 5 % in all six studied autosomes (*Figure 2B*).  
235 The efficiency of synapsis rescue was gradual with an apparent change point (*Figure*  
236 *2B*). To describe the pattern in the data a segmented regression model was used  
237 (see Materials and Methods). The model based on the data pooled from all 2-chr  
238 crosses was selected as the best model with an estimated change point estimate at  
239 27.14 Mb (19.36; 34.91) (95% CI) (see *table supplement 9*). The slope of the  
240 decrease of asynapsis in the region of consubspecific intervals shorter than 27.14 Mb

241 was different for the respective chromosomes, reflecting the asynapsis rate in  
242 respective chromosomes in F1 cross ( $P < 3 \times 10^{-11}$  F-test).  
243 - In spite of the known role of subtelomeric (bouquet) association in chromosome  
244 pairing (ISHIGURO *et al.* 2014; SCHERTHAN *et al.* 2014), the location of the  
245 consubspecific sequence at the telomeric end was not essential for synapsis. The  
246 PWD/PWD intervals of sufficient size located at the centromeric (proximal), interstitial,  
247 or telomeric (distal) positions rescued synapsis as well (*Figure 2B - table*  
248 *supplements 3-8*).

#### 249 **Reversal of hybrid sterility by targeted suppression of asynapsis of four of the most** 250 **asynapsis-sensitive autosomes**

251 The above experiments have shown that a randomly located consubspecific  
252 PWD/PWD interval with a 27 or more Mb on otherwise intersubspecific PWD/B6  
253 background is sufficient to restore the pachytene synapsis of a given autosomal pair.  
254 To check the causal relationship between meiotic chromosome asynapsis and HS,  
255 we attempted to reverse HS by reducing the asynapsis in the four most asynapsis-  
256 prone chromosomes. Provided that hybrid male sterility is directly dependent on  
257 chromosome synapsis we predicted, by multiplying the probabilities of the synapsis  
258 of individual chromosomes obtained in F1 hybrids, that complete elimination of  
259 asynapsis of four of the shortest autosomes (excluding Chr 17 to avoid *Prdm9*<sup>PWD/PWD</sup>  
260 interference) could increase the proportion of primary spermatocytes with the full set  
261 of synapsed autosomes up to 26.7% and potentially abolish apoptosis of these cells  
262 to yield around 5 million sperm cells in the epididymis of the hybrid males.

263 To evaluate the above prediction experimentally, random intervals of consomic Chrs  
264 15<sup>PWD</sup>, 16<sup>PWD</sup>, 18<sup>PWD</sup>, and 19<sup>PWD</sup> were transferred on the genetic background of B6

265 mice in a three-generation cross as shown in *Figure 3A*. Eleven G3 males selected  
266 for maximal extent of PWD sequence on these chromosomes were crossed to PWD  
267 females (*Figure 3A -table supplement 10*). The resulting G4 hybrid male progeny  
268 (hereafter 4-chr cross) displayed various degrees of PWD homozygosity in the  
269 studied consomic autosomes on otherwise intersubspecific PWD/B6 genetic  
270 background. As predicted, a significant fraction of hybrid males indeed showed  
271 partial rescue of spermatogenesis. While in the PB6F1 cross, 100 % of hybrid males  
272 displayed no sperm in the epididymis, in the 4-chr cross, only 51.7 % of 87 G4 males  
273 were aspermic, 19.5 % had a  $0.01\text{--}0.74 \times 10^6$  sperm count, and 28.7 % had  $1.0\text{--}13.7$   
274  $\times 10^6$  sperm cells (*Figure 3B - figure supplement 2, table supplement 11*).

275 Next, we asked whether the reversal of meiotic arrest correlates with the recovery of  
276 meiotic synapsis of recombined chromosomes and with the size of PWD/PWD  
277 consubspecific stretches in the four manipulated chromosomes. Eighteen G4 males  
278 were deliberately selected according to their fertility parameters, 13 with HS partial  
279 rescue, displaying sperm cells in the epididymis ( $0,1 \times 10^6\text{--}6,9 \times 10^6$ ), and five  
280 aspermic controls. The meiotic analysis of over 6500 pachynemas from the  
281 genotyped males indeed confirmed the prediction based on the results of 2-chr  
282 crosses. The nonrecombinant PWD/PWD consubspecific bivalents were always fully  
283 synapsed, while all nonrecombinant PWD/B6 intersubspecific pairs revealed the  
284 highest frequencies of asynapsis. All recombinant chromosomes with consubspecific  
285 intervals of sufficient length (*Figure 3B -table supplement 12; see table supplement 9*  
286 for change point estimates) effectively restored synapsis. Moreover, the presence of  
287 sperm cells corresponded with the rescue of synapsis of consomic chromosomes. As  
288 a rule of thumb, the hybrids had sperm when asynapsis was suppressed in at least  
289 three of four segregating chromosomes and when the probability of all four consomic

290 chromosomes being synapsed was  $> 0.7$ . Chrs 16, 18, and 19 contributed the  
291 strongest effect. (*Figure 3C - table supplement 12*).

## 292 Evidence for a trans-effect on the rate of asynapsis

293 Provided the probability of failure of the synapsis of each chromosome was  
294 completely independent of the rest of the hybrid genome, the asynapsis rate of the  
295 nonrecombinant intersubspecific chromosome pairs would be the same in F1 hybrids,  
296 2-chr crosses, and 4-chr cross. Moreover, the frequency of pachynemas with all  
297 chromosomes synapsed could be predicted from the observed frequencies of the  
298 synapsis of individual chromosomes. Such predicted values would be close to the  
299 values directly read from the meiotic spreads and would lie along the diagonal in  
300 *Figure 4*. As shown below, both types of analysis clearly revealed that the asynapsis  
301 rate of a particular chromosome depends on the synapsis status of other  
302 chromosomes. In PB6F1 hybrids, the observed 13.1 % (11.4 %, 14.9 %) (95 % CI) of  
303 fully synapsed pachynemas was double ( $P = 0.023$ , Mann-Whitney test) the rate  
304 expected by the multiplication of the observed synapsis rates 6.6 % (5.3 %, 8.1 %) of  
305 individual chromosomes (*Figure 4*) indicating a *trans* effect of synapsed autosomes  
306 on the probability of the asynapsis of other intersubspecific chromosome pairs. The  
307 tendency is more pronounced in data from 2-chr crosses and 4-chr cross  
308 experiments. The most straightforward comparison is between the nonrecombinant  
309 PWD/B6 intersubspecific chromosomes from F1 hybrids and 2-chr cross or 4-chr  
310 crosses, where the asynapsis rate is dramatically reduced to 58–91 % of the  
311 respective F1 hybrids' rates. Moreover, the difference between the observed and  
312 expected ratios of asynaptic pachynemas increased with increasing probability of  
313 sperm cells in the epididymis (*Figure 4 - table supplement 13*). In 4-chr cross, the  
314 *trans* effect was analyzed further by comparing the asynapsis rate of a given

315 nonrecombinant PWD/B6 pair with the other three analyzed chromosomes. *Figure*  
316 *supplement 3* shows a negative correlation (from  $r = -0.45$  for Chr 16 to  $r = -0.88$  for  
317 Chr 15, linear regression slope is  $\beta_{3\_chrs\_syn} = -0.19$ ,  $P = 0.0003$ ) between the  
318 asynapsis rate of the nonrecombinant chromosome and the probability of synapsis of  
319 the other three studied chromosomes.

320 It has to be emphasized that in the animals with identical *Prdm9* and *Hstx2* and  
321 mostly intersubspecific chromosomes investigated in this work, the *cis*-effect of the  
322 PWD/PWD length in a given chromosome dominates over the *trans*-effect. Namely,  
323 the *trans*-effect can be more clearly observed when conditioned on the *cis*-effect of  
324 the PWD/PWD length in a given chromosome ( $P = 0.002$ , F-test), while it is harder to  
325 detect ( $P = 0.042$ , F-test) when the PWD/PWD length in a given chromosome is not  
326 taken into account. On the other hand, the asynapsis rate critically depends on the  
327 *cis*-effect of the PWD/PWD length in a given chromosome ( $P < 2 \times 10^{-16}$ , F-test) when  
328 the *trans*-effect is not taken into account.

329 To conclude, the described *trans* effect enhances the probability of the successful  
330 pairing of intersubspecific chromosomes in males with identical *Prdm9* and *Hstx2*.  
331 The mechanism is unknown, but it is tempting to speculate that a rate-limiting step of  
332 an anti-recombination mismatch repair machinery (SPIES and FISHEL 2015;  
333 CHAKRABORTY and ALANI 2016) could be involved as elaborated in Discussion.

## 334 Discussion

335 While the genic control of HS and meiotic synapsis in PBF1 hybrids can be  
336 demonstrated by complete restitution of fertility and meiotic pairing in males with  
337 *Prdm9*<sup>PWD/PWD</sup> or *Prdm9*<sup>PWD/B6Hu</sup> genotypes and partial recovery in *Prdm9*<sup>PWD/C3H</sup>

338 males (DZUR-GEJDOSOVA *et al.* 2012; BHATTACHARYYA *et al.* 2013; DAVIES *et al.* 2016),  
339 a chromosome-autonomous nature of asynapsis became apparent in experiments  
340 where PB6F1 hybrids carried a single pair of PWD/PWD consubspecific homologs.  
341 The males remained sterile, but synapsis of the particular consubspecific pair was  
342 completely restored (BHATTACHARYYA *et al.* 2013). Such regulation of meiotic  
343 asynapsis in PBF1 hybrids can be explained by a combined effect of the  
344 chromosome-autonomous interaction of homologs operating *in cis* and *Prdm9/Hstx2*  
345 incompatibility operating *in trans*. Here we separated the non-genic chromosome  
346 autonomous from genic control mechanisms by keeping the sterility-determining  
347 allelic combination of the *Prdm9*<sup>PWD</sup>/*Prdm9*<sup>B6</sup> gene and *Hstx2*<sup>PWD</sup> locus constant in all  
348 crosses, while successively introgressing stretches of the PWD/PWD consubspecific  
349 sequence into eight PWD/B6 intersubspecific autosomal pairs.

350 **The meiotic asynapsis rate correlates with the presumed paucity of symmetric DSBs**  
351 **in individual chromosomes in sterile hybrids**

352 Davies and coworkers (DAVIES *et al.* 2016) found that the DNA-binding zinc finger  
353 domain of PRDM9 molecule is responsible for sterility in PB6F1 hybrids. In the sterile  
354 hybrids, most PRDM9<sup>PWD</sup>-specific hotspots reside on B6 chromosomes and, *vice*  
355 *versa*, most of the PRDM9<sup>B6</sup> binding sites are activated on PWD chromosomes. This  
356 asymmetry could be explained in part by erosion of the PRDM9 binding sites due to  
357 preferential transmission to progeny of the mutated hotspots motifs (BOULTON *et al.*  
358 1997; MYERS *et al.* 2010). In a parallel study, (SMAGULOVA *et al.* 2016) authors  
359 identified a novel class of strong hotspots absent in PWD and B6 parents apparently  
360 related to asymmetric hotspots described in (DAVIES *et al.* 2016). Moreover, *Prdm9*-  
361 independent 'default' hotspots were particularly enriched in Chr X and we noticed that  
362 percentage of these 'default' hotspots in autosomes correlates with the present data



363 on asynapsis rate in F1 hybrids (Spearman's  $\rho = 0.69$ ,  $P = 0.0012$ ). We assume  
364 that these *Prdm9*-independent hotspots could represent the late-forming DSBs on  
365 unsynapsed chromosomes and, as such, they may be a consequence rather than the  
366 cause of meiotic asynapsis (see (KAUPPI *et al.* 2013)).

367 We found that meiotic asynapsis affects each autosomal pair in PB6F1  
368 intersubspecific hybrids at distinctively unequal rates, with shorter chromosomes  
369 affected more often than the longer ones. A similar pattern of higher sensitivity of  
370 smaller autosomes to the synapsis failure was observed in mice with lowered  
371 dosages of SPO11 (KAUPPI *et al.* 2013) and consequent twofold DSB reduction. The  
372 fact that the asynapsis rate of sterile F1 hybrids correlates better with SPO11-oligo  
373 derived DSB density (inferred from B6 mouse strain data (LANGE *et al.* 2016) than  
374 with the chromosome length brings the first experimental evidence for the idea  
375 (DAVIES *et al.* 2016) linking the asynapsis in sterile PB6F1 hybrids to insufficient  
376 number of symmetric DSB hotspots.

### 377 **Small stretches of consubspecific sequence restore the synapsis of intersubspecific** 378 **chromosomes**

379 Provided that a shortage of symmetric DSB hotspots (DAVIES *et al.* 2016) is the  
380 ultimate cause of failure of meiotic synapsis of intersubspecific homologs, then by  
381 exchanging the asymmetric hotspots for the symmetric ones the full synapsis could  
382 be restored. To experimentally test this prediction, we constructed pairs of PWD/B6  
383 intersubspecific homologs with stretches of PWD/PWD consubspecific intervals,  
384 which by definition cannot carry asymmetric hotspots. We found that chromosomes  
385 with 27 Mb or longer stretches of consubspecific PWD/PWD sequence always  
386 rescued full synapsis in male hybrids between PWD females and consomic B6.PWD-

387 Chr # males. The position of the consubspecific interval along the chromosome was  
388 not critical for synapsis rescue, in accordance with the finding that synaptonemal  
389 complexes nucleate at multiple recombination sites in each chromosome (ZICKLER  
390 and KLECKNER 2015; FINSTERBUSCH *et al.* 2016). We assume that the presence of  
391 symmetric DSB hotspots within the PWD/PWD homozygous stretches exceeded the  
392 threshold of a minimum number of symmetric DSBs thus rescuing normal meiotic  
393 synapsis.

394 Allowing for the assumptions enumerated in in the first section of Results the number  
395 of DSBs necessary for proper synapsis of a given chromosome can be estimated  
396 based on the expected distribution of symmetric DSB hotspots on all autosomes and  
397 their asynapsis ratios in sterile F1 hybrids (*Table supplement 2*). We aimed to model  
398 how the induction and repair of DSBs influence proper meiotic synapsis, and tried to  
399 estimate the minimum number of symmetric DSBs per chromosome sufficient for full  
400 meiotic synapsis. Our model predicts that in approximately 25 % of cases, a  
401 chromosome is asynapsed because there is no symmetric DSB (median of  
402  $P(\text{asynapsis}) / P(0 \text{ symmetric DSBs}) = 4.5$ ). Assuming a critical threshold of the  
403 required DSBs, the remaining 75 % of asynapsis could occur on chromosomes with  
404 one symmetric DSB. It is consistent with our data that all asynapsis occurs when  
405 there is 0 or 1 symmetric DSBs (median of  $P(\text{asynapsis}) / P(0 \text{ or symmetric DSBs}) =$   
406 1.0) and that two symmetric DSBs per chromosome could be sufficient for full  
407 development of the synaptonemal complex, as shown in *Figure 5* for PB6F1 hybrids.  
408 The same conclusion also holds true for 2-chr cross and 4-chr cross experiments  
409 (*Figure 5 - figure supplement 4 and 5*). The deviations from the diagonal in the  
410 *Figure 5* depicting 4-chr cross can be explained by the *trans*-effect described in the  
411 Results section.

## 412 On the chromosomal nature of hybrid sterility

413 It has been tacitly assumed, that the early meiotic arrest in sterile PBF1 males is due  
414 to the high incidence of asynapsed chromosomes in zygotene/pachytene  
415 spermatocytes of PBF1 hybrid males (BHATTACHARYYA *et al.* 2013). Here we provided  
416 the first experimental evidence on linkage between *Prdm9*-controlled asynapsis and  
417 meiotic arrest in PBF1 hybrid males by targeted suppression of asynapsis rate in  
418 selected autosomes. The suppression of asynapsis in any of three combinations of  
419 two PWD/B6 recombinant chromosomes (2-chr cross experiment) did not improve  
420 the spermatogenic arrest. However, when hybrid genomes with four short  
421 recombinant chromosomes (that are most sensitive to asynapsis) were constructed,  
422 almost 50 % of males had sperm in the epididymis and normal testis size. By  
423 improving synapsis in three of the four manipulated chromosomes (representing  
424 ~11 % of the genome) with randomly located PWD/PWD homozygous intervals,  
425 more than 40 % of pachynemas regained full chromosome synapsis and yielded  
426 sperm. These results show that the high incidence of primary spermatocytes with  
427 asynaptic chromosomes is indeed the factor determining the extent of meiotic arrest  
428 in intersubspecific PBF1 hybrids.

429 The specific feature of PBF1 hybrid sterility consists in the inter-homolog interactions  
430 controlled by the *Prdm9* and *Hstx2* genes. The interhomolog incompatibility caused  
431 by single nucleotide variation in PRDM9 binding sites, which are situated away from  
432 coding genes (BAUDAT *et al.* 2013) is proposed to make the asymmetric sites difficult  
433 to repair (SMAGULOVA *et al.* 2016). We hypothesize that building the meiotic barrier  
434 between (sub)species begins with genome-wide accumulation of single nucleotide  
435 variants within PRDM9 binding sites and leading to gene conversion-guided meiotic

436 drive (BAKER *et al.* 2015). In the subspecific hybrids the asymmetric binding sites can  
437 be more difficult to repair using the homolog from the other subspecies as a template  
438 because of the strict requirements for sequence identity resulting in the rejection of  
439 mismatched heteroduplex intermediates as demonstrated in yeast (SUGAWARA *et al.*  
440 2004). Originally, such an inter-species barrier was proposed by Radman and  
441 colleagues (RAYSSIGUIER *et al.* 1989; STAMBUK and RADMAN 1998) to prevent  
442 homeologous recombination between *E. coli* and *Salmonella typhiimurium*. Among  
443 eukaryotes, the role of the mismatch repair system in reproductive isolation was  
444 reported in *Saccharomyces* species (HUNTER *et al.* 1996; GREIG *et al.* 2003; LITI *et al.*  
445 2006). An exciting possibility arises that the heteroduplex rejection activity of  
446 mismatch repair machinery could operate as a mechanism gradually restricting gene  
447 flow between related (sub)species, a *conditio sine qua non* of speciation.

## 448 **Materials and Methods**

449 **Mice, Ethics Statement and Genotyping.** The mice were maintained at the Institute  
450 of Molecular Genetics in Prague and Vestec, Czech Republic. The project was  
451 approved by the Animal Care and use Committee of the Institute of Molecular  
452 Genetics AS CR, protocol No 141/2012. The principles of laboratory animal care,  
453 Czech Act No. 246/1992 Sb., compatible with EU Council Directive 86/609/EEC and  
454 Appendix of the Council of Europe Convention ETS, were observed. SSLP markers  
455 used for genotyping consomic chromosomes in 2-chr crosses and 4-chr cross are  
456 listed in *table supplement 14*. Detailed descriptions of inbred mouse strains, fertility  
457 testing and genotyping are given in the *Supplementary text*.

458 **Antibodies for the immunostaining of spread spermatocytes.** Detailed  
459 descriptions of the preparation of meiotic spreads and the visualization of SYCP3,

460  $\gamma$ H2AFX, and HORMAD2 proteins on spreads of meiotic cells are given in the  
461 *Supplementary Materials and Methods*.

462 **DNA and RNA FISH.** To identify individual chromosomes, XMP Xcyting Mouse  
463 Chromosome N Whole Painting Probes (Metasystem) were used for DNA FISH.  
464 Identification of nascent RNA in pachytene spermatocytes was performed as  
465 previously described (MAHADEVAIAH *et al.* 2009), with modifications. A detailed  
466 description is given in the *Supplementary Materials and Methods*.

467 **Microscopy and image capture.** Images were observed using a Nikon Eclipse 400  
468 epifluorescence microscope and captured with a DS-QiMc mono-chrome camera  
469 (Nikon). Images were analyzed using the NIS elements program. A detailed  
470 description is given in the *Supplementary Materials and Methods*.

#### 471 **Statistics**

472 All calculations were performed in the statistical environment R 3.2.2. For modeling  
473 the dependence between the asynapsis rate and the number of symmetric DSBs, we  
474 determined the probabilistic distribution of the number of symmetric DSBs. The  
475 distribution was determined by simulation and with parameters based on previous  
476 studies: (i) The number of DSBs per cell (BHATTACHARYYA *et al.* 2013) was modeled  
477 as an observation from the normal distribution  $N(250, sd=20)$ . (ii) We assumed a  
478 number of DSBs proportional to Spo11 oligos (LANGE *et al.* 2016) in each autosome.  
479 (iii) The positions of DSBs in the particular autosome were simulated from the  
480 uniform distribution,  $U(0, \text{Autosome length})$ . (iv) For the intersubspecific part of the  
481 autosome, the number of symmetric DSBs was simulated from the binomial  
482 distribution  $Bi(n=N\_DSBs\_in\_het\_part, p=0.28)$  (DAVIES *et al.* 2016; SMAGULOVA *et al.*  
483 2016) For the consubspecific part of the autosome, all DSBs were taken as

484 symmetric. The total number of symmetric DSBs in the autosome was taken as the  
485 sum of symmetric DSBs in the respective parts.

486 Steps (i) - (iv) were performed in N=100000 simulations to obtain a probabilistic  
487 distribution. Further details on statistical evaluation are given in the *Supplementary*  
488 *Materials and Methods*.

489

490

---

## 491 **References**

- 492 BAKER, C. L., S. KAJITA, M. WALKER, R. L. SAXL, N. RAGHUPATHY *et al.*, 2015 PRDM9  
493 drives evolutionary erosion of hotspots in *Mus musculus* through haplotype-  
494 specific initiation of meiotic recombination. *PLoS Genet* **11**: e1004916.
- 495 BAUDAT, F., Y. IMAI and B. DE MASSY, 2013 Meiotic recombination in mammals:  
496 localization and regulation. *Nat Rev Genet* **14**: 794-806.
- 497 BHATTACHARYYA, T., S. GREGOROVA, O. MIHOLA, M. ANGER, J. SEBESTOVA *et al.*, 2013  
498 Mechanistic basis of infertility of mouse intersubspecific hybrids. *Proc Natl*  
499 *Acad Sci U S A* **110**: E468-477.
- 500 BHATTACHARYYA, T., R. REIFOVA, S. GREGOROVA, P. SIMECEK, V. GERGELITS *et al.*,  
501 2014 X chromosome control of meiotic chromosome synapsis in mouse inter-  
502 subspecific hybrids. *PLoS Genet* **10**: e1004088.
- 503 BOULTON, A., R. S. MYERS and R. J. REDFIELD, 1997 The hotspot conversion paradox  
504 and the evolution of meiotic recombination. *Proc Natl Acad Sci U S A* **94**:  
505 8058-8063.
- 506 BRUNSWIG, H., L. LEVI, E. BEN-DAVID, R. W. WILLIAMS, B. YAKIR *et al.*, 2012 Fine-  
507 scale maps of recombination rates and hotspots in the mouse genome.  
508 *Genetics* **191**: 757-764.
- 509 BURGOYNE, P. S., S. K. MAHADEVAIAH and J. M. TURNER, 2009 The consequences of  
510 asynapsis for mammalian meiosis. *Nat Rev Genet* **10**: 207-216.

- 511 COYNE, J. A., and H. A. ORR, 2004 *Speciation*. Sinauer Associates, Sunderland,  
512 Massachusetts.
- 513 DAVIES, B., E. HATTON, N. ALTEMOSE, J. G. HUSSIN, F. PRATTO *et al.*, 2016 Re-  
514 engineering the zinc fingers of PRDM9 reverses hybrid sterility in mice. *Nature*  
515 **530**: 171-176.
- 516 DOBZHANSKY, T., 1951 in *Genetics and the origin of Species*. Columbia University,  
517 New York.
- 518 DZUR-GEJDOSOVA, M., P. SIMECEK, S. GREGOROVA, T. BHATTACHARYYA and J. FOREJT,  
519 2012 Dissecting the genetic architecture of f(1) hybrid sterility in house mice.  
520 *Evolution* **66**: 3321-3335.
- 521 FINSTERBUSCH, F., R. RAVINDRANATHAN, I. DERELI, M. STANZIONE, D. TRANKNER *et al.*,  
522 2016 Alignment of Homologous Chromosomes and Effective Repair of  
523 Programmed DNA Double-Strand Breaks during Mouse Meiosis Require the  
524 Minichromosome Maintenance Domain Containing 2 (MCMDC2) Protein.  
525 *PLoS Genet* **12**: e1006393.
- 526 FLACHS, P., O. MIHOLA, P. SIMECEK, S. GREGOROVA, J. C. SCHIMENTI *et al.*, 2012  
527 Interallelic and intergenic incompatibilities of the Prdm9 (Hst1) gene in mouse  
528 hybrid sterility. *PLoS Genet* **8**: e1003044.
- 529 FOREJT, J., and P. IVANYI, 1974 Genetic studies on male sterility of hybrids between  
530 laboratory and wild mice (*Mus musculus* L.). *Genet Res* **24**: 189-206.
- 531 FOREJT, J., J. PIALEK and Z. TRACHTULEC, 2012 Hybrid male sterility genes in the  
532 mouse subspecific crosses, pp. 482-503 in *Evolution of the House Mouse*,  
533 edited by M. MACHOLAN, S. J. E. BAIRD, P. MUCLINGER and J. PIALEK.  
534 Cambridge University Press, Cambridge.
- 535 FORSDYKE, D. R., 2017 Speciation: Goldschmidt's chromosomal heresy, once  
536 supported by Gould and Dawkins, is again reinstated. *Biol. Theory* **12**: 4-12.
- 537 GREGOROVA, S., P. DIVINA, R. STORCHOVA, Z. TRACHTULEC, V. FOTOPULOSOVA *et al.*,  
538 2008 Mouse consomic strains: exploiting genetic divergence between *Mus m.*  
539 *musculus* and *Mus m. domesticus* subspecies. *Genome Res* **18**: 509-515.
- 540 GREGOROVA, S., and J. FOREJT, 2000 PWD/Ph and PWK/Ph inbred mouse strains of  
541 *Mus m. musculus* subspecies--a valuable resource of phenotypic variations  
542 and genomic polymorphisms. *Folia Biol (Praha)* **46**: 31-41.

- 543 GREGOROVA, S., M. MNUKOVA-FAJDELOVA, Z. TRACHTULEC, J. CAPKOVA, M. LOUDOVA *et*  
544 *al.*, 1996 Sub-milliMorgan map of the proximal part of mouse Chromosome 17  
545 including the hybrid sterility 1 gene. *Mamm Genome* **7**: 107-113.
- 546 GREIG, D., M. TRAVISANO, E. J. LOUIS and R. H. BORTS, 2003 A role for the mismatch  
547 repair system during incipient speciation in *Saccharomyces*. *J Evol Biol* **16**:  
548 429-437.
- 549 HALDANE, J., 1922 Sex ration and unisexual sterility in animal hybrids. *J. Genet.* **12**:  
550 101-109.
- 551 HALL, L. L., D. M. CARONE, A. V. GOMEZ, H. J. KOLPA, M. BYRON *et al.*, 2014 Stable  
552 COT-1 repeat RNA is abundant and is associated with euchromatic interphase  
553 chromosomes. *Cell* **156**: 907-919.
- 554 HUNTER, N., S. CHAMBERS, E. LOUIS and R. BORTS, 1996 The mismatch repair system  
555 contributes to meiotic sterility in an interspecific yeast hybrid. *EMBO J* **15**:  
556 1726-1733.
- 557 CHAKRABORTY, U., and E. ALANI, 2016 Understanding how mismatch repair proteins  
558 participate in the repair/anti-recombination decision. *FEMS Yeast Res* **16**: pii:  
559 fow071.
- 560 ISHIGURO, K., J. KIM, H. SHIBUYA, A. HERNANDEZ-HERNANDEZ, A. SUZUKI *et al.*, 2014  
561 Meiosis-specific cohesin mediates homolog recognition in mouse  
562 spermatocytes. *Genes Dev* **28**: 594-607.
- 563 KAUPPI, L., M. BARCHI, J. LANGE, F. BAUDAT, M. JASIN *et al.*, 2013 Numerical  
564 constraints and feedback control of double-strand breaks in mouse meiosis.  
565 *Genes Dev* **27**: 873-886.
- 566 LANGE, J., S. YAMADA, S. E. TISCHFIELD, J. PAN, S. KIM *et al.*, 2016 The Landscape of  
567 Mouse Meiotic Double-Strand Break Formation, Processing, and Repair. *Cell*  
568 **167**: 695-708 e616.
- 569 LARSON, E. L., S. KEEBLE, D. VANDERPOOL, M. D. DEAN and J. M. GOOD, 2016 The  
570 composite regulatory basis of the large X-effect in mouse speciation. *Mol Biol*  
571 *Evol* **34**: 282-295.
- 572 LITI, G., D. B. H. BARTON and E. J. LOUIS, 2006 Sequence diversity, reproductive  
573 isolation and species concepts in *Saccharomyces*. *Genetics* **174**: 839-850.
- 574 MAHADEVAIAH, S. K., D. BOURC'HIS, D. G. DE ROOIJ, T. H. BESTOR, J. M. TURNER *et al.*,  
575 2008 Extensive meiotic asynapsis in mice antagonises meiotic silencing of



- 576 unsynapsed chromatin and consequently disrupts meiotic sex chromosome  
577 inactivation. *J Cell Biol* **182**: 263-276.
- 578 MAHADEVAIAH, S. K., Y. COSTA and J. M. TURNER, 2009 Using RNA FISH to study  
579 gene expression during mammalian meiosis. *Methods Mol Biol* **558**: 433-444.
- 580 MAHESHWARI, S., and D. A. BARBASH, 2010 The Genetics of Hybrid Incompatibilities.  
581 *Annu Rev Genet* **45**: 331-355.
- 582 MASLY, J. P., C. D. JONES, M. A. NOOR, J. LOCKE and H. A. ORR, 2006 Gene  
583 transposition as a cause of hybrid sterility in *Drosophila*. *Science* **313**: 1448-  
584 1450.
- 585 MIHOLA, O., Z. TRACHTULEC, C. VLCEK, J. C. SCHIMENTI and J. FOREJT, 2009 A mouse  
586 speciation gene encodes a meiotic histone H3 methyltransferase. *Science*  
587 **323**: 373-375.
- 588 MULLER, H., and G. PONTECORVO, 1942 Recessive genes causing interspecific  
589 sterility and other disharmonies between *Drosophila melanogaster* and  
590 *simulans*. *Genetics* **27**: 157.
- 591 MYERS, S., R. BOWDEN, A. TUMIAN, R. E. BONTROP, C. FREEMAN *et al.*, 2010 Drive  
592 against hotspot motifs in primates implicates the PRDM9 gene in meiotic  
593 recombination. *Science* **327**: 876-879.
- 594 ORR, H. A., 1996 Dobzhansky, Bateson, and the genetics of speciation. *Genetics*  
595 **144**: 1331-1335.
- 596 ORR, H. A., 2005 The genetic basis of reproductive isolation: insights from *Drosophila*.  
597 *Proc Natl Acad Sci U S A* **102 Suppl 1**: 6522-6526.
- 598 PARVANOV, E. D., P. M. PETKOV and K. PAIGEN, 2010 Prdm9 controls activation of  
599 mammalian recombination hotspots. *Science* **327**: 835.
- 600 PHADNIS, N., and H. A. ORR, 2009 A single gene causes both male sterility and  
601 segregation distortion in *Drosophila* hybrids. *Science* **323**: 376-379.
- 602 POWERS, N. R., E. D. PARVANOV, C. L. BAKER, M. WALKER, P. M. PETKOV *et al.*, 2016  
603 The Meiotic Recombination Activator PRDM9 Trimethylates Both H3K36 and  
604 H3K4 at Recombination Hotspots In Vivo. *PLoS Genet* **12**: e1006146.
- 605 PRESGRAVES, D. C., 2008 Sex chromosomes and speciation in *Drosophila*. *Trends*  
606 *Genet* **24**: 336-343.
- 607 RAYSSIGUIER, C., D. S. THALER and M. RADMAN, 1989 The barrier to recombination  
608 between *Escherichia coli* and *Salmonella typhimurium* is disrupted in  
609 mismatch-repair mutants. *Nature* **342**: 396-401.

- 610 SCHERTHAN, H., K. SCHOFISCH, T. DELL and D. ILLNER, 2014 Contrasting behavior of  
611 heterochromatic and euchromatic chromosome portions and pericentric  
612 genome separation in pre-bouquet spermatocytes of hybrid mice.  
613 *Chromosoma* **123**: 609-624.
- 614 SMAGULOVA, F., K. BRICK, Y. M. PU, R. D. CAMERINI-OTERO and G. V. PETUKHOVA,  
615 2016 The evolutionary turnover of recombination hot spots contributes to  
616 speciation in mice. *Genes & Development* **30**: 266-280.
- 617 SPIES, M., and R. FISHEL, 2015 Mismatch repair during homologous and  
618 homeologous recombination. *Cold Spring Harb Perspect Biol* **7**: a022657.
- 619 STAMBUK, S., and M. RADMAN, 1998 Mechanism and control of interspecies  
620 recombination in *Escherichia coli*. I. Mismatch repair, methylation,  
621 recombination and replication functions. *Genetics* **150**: 533-542.
- 622 SUGAWARA, N., T. GOLDFARB, B. STUDAMIRE, E. ALANI and J. E. HABER, 2004  
623 Heteroduplex rejection during single-strand annealing requires Sgs1 helicase  
624 and mismatch repair proteins Msh2 and Msh6 but not Pms1. *Proc Natl Acad  
625 Sci U S A* **101**: 9315-9320.
- 626 TING, C., S. TSAUR, M. WU and C. WU, 1998 A rapidly evolving homeobox at the site  
627 of a hybrid sterility gene [see comments]. *Science* **282**: 1501-1504.
- 628 TRACHTULEC, Z., M. MNUKOVA-FAJDELOVA, R. M. HAMVAS, S. GREGOROVA, W. E.  
629 MAYER *et al.*, 1997 Isolation of candidate hybrid sterility 1 genes by cDNA  
630 selection in a 1.1 megabase pair region on mouse chromosome 17. *Mamm  
631 Genome* **8**: 312-316.
- 632 WOJTASZ, L., J. M. CLOUTIER, M. BAUMANN, K. DANIEL, J. VARGA *et al.*, 2012 Meiotic  
633 DNA double-strand breaks and chromosome asynapsis in mice are monitored  
634 by distinct HORMAD2-independent and -dependent mechanisms. *Genes Dev*  
635 **26**: 958-973.
- 636 YAMADA, S., S. KIM, S. E. TISCHFIELD, M. JASIN, J. LANGE *et al.*, 2017 Genomic and  
637 chromatin features shaping meiotic double-strand break formation and repair  
638 in mice. *Cell Cycle*: 1-15.
- 639 ZHANG, L., T. SUN, F. WOLDESELLASSIE, H. XIAO and Y. TAO, 2015 Sex ratio meiotic  
640 drive as a plausible evolutionary mechanism for hybrid male sterility. *PLoS  
641 Genet* **11**: e1005073.
- 642 ZICKLER, D., and N. KLECKNER, 2015 Recombination, Pairing, and Synapsis of  
643 Homologs during Meiosis. *Cold Spring Harb Perspect Biol* **7**: pii: a016626.

644

645

A

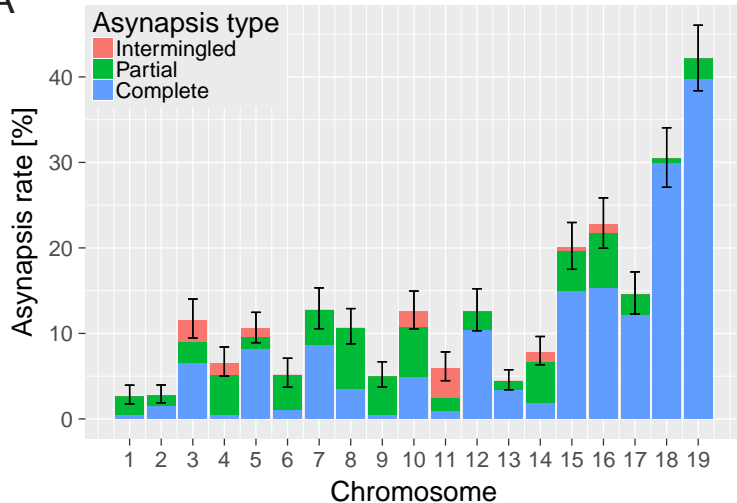

B

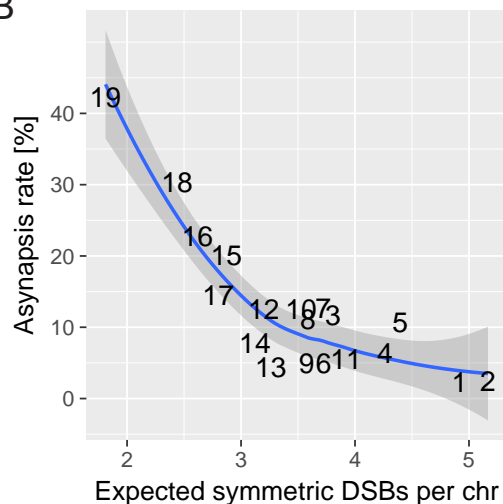

**Figure 1.** The asynapsis rate of individual autosomes in sterile male (PWD x B6)F1 hybrids. (A) Mean asynapsis rate  $\pm$  S.E (based on GLMM model). Intermingled asynapsis refers to overlaps of two or more asynapsed chromosomes within the DNA FISH cloud of chromatin. Smaller chromosomes had higher asynapsis rate (GLMM model,  $P < 1.1 \times 10^{-13}$ ). Concurrently, the chromosomes with higher asynapsis rate were also more involved in complete rather than partial asynapsis (GLMM model,  $P < 6.3 \times 10^{-5}$ ). Proportion of complete and partial asynapsis was controlled by the asynapsis rate rather the chromosomal length (test for effect of the length when controlled for the asynapsis rate, 0.491). (B) Negative correlation (Spearman's  $\rho = -0.76$ ,  $P = 0.0002$ ) between asynapsis rate and mean expected number of symmetric DSBs (29) based on the chromosome-wide distribution of SPO11 oligos in fertile B6 males (30).

The following table supplement is available for figure 1.

**Table supplement 1.** Asynapsis rate of individual chromosomes of (PWD x B6)F1 males.

A

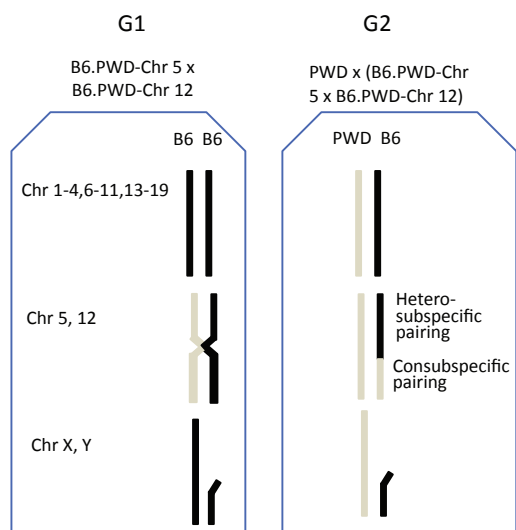

B

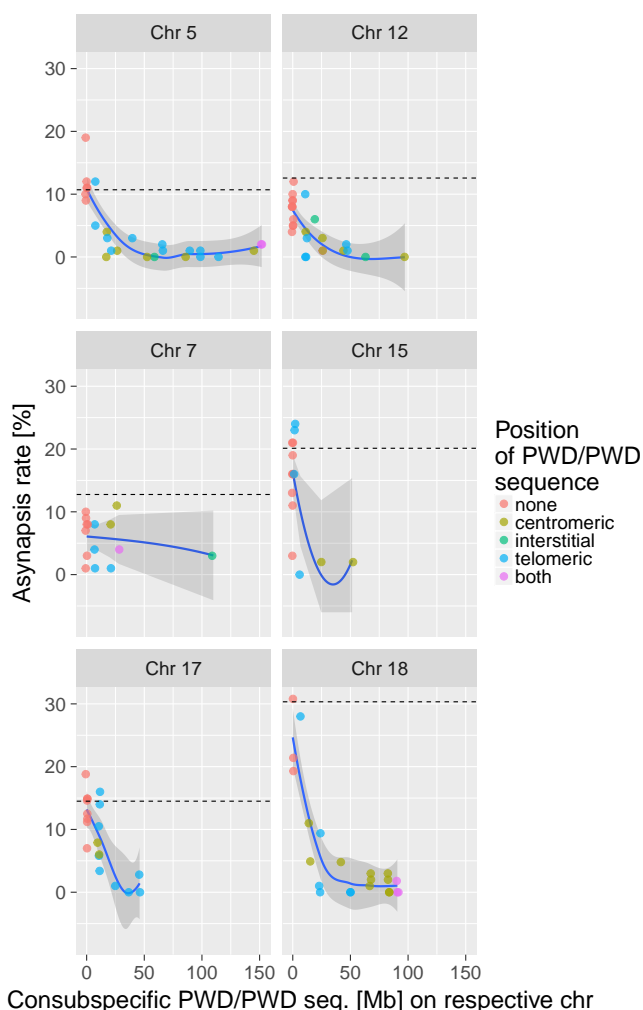

**Figure 2.** The effect of consubspecific PWD/PWD stretches of genomic sequence on pachytene synapsis, 2-chr cross. (A) The F1 hybrid males of two consomic strains (generation 1 - G1, Chr 5 and Chr 12 shown here) were crossed to PWD females to produce generation 2 - G2 sterile F1 hybrids with random recombinant consomic chromosomes 5 and 12. Using whole chromosome probes, the asynapsis rate of the consomic chromosomes was scored by DNA FISH. (B) Combination of two chromosomes (5+12, 7+15 and 17+18) were challenged in each experiment. The localization of PWD homozygous sequence with respect to centromere, interstitial part of the chromosome, telomere, or on both ends is distinguished by color (see also Tables Supplement 3 – Supplement 8). The average length between the minimum and maximum of the consubspecific sequence is plotted. The mean asynapsis rate of a given chromosome is regularly higher in PB6F1 hybrids (dashed line) than in 2-chr cross. For explanation see Fig. 4 and the chapter on the trans-effect dependent variation in asynapsis rate. Loess curve with 95% CI.

The following table supplements are available for figure 2.

**Table supplement 3.** The effect of the size and location of PWD/PWD consubspecific intervals on asynapsis of Chr 5.

**Table supplement 4.** The effect of the size and location of PWD/PWD consubspecific intervals on asynapsis of Chr 12.

**Table supplement 5.** The effect of the size and location of PWD/PWD consubspecific intervals on asynapsis of Chr 7.

**Table supplement 6.** The effect of the size and location of PWD/PWD consubspecific intervals on asynapsis of Chr 15.

**Table supplement 7.** The effect of the size and location of PWD/PWD consubspecific intervals on asynapsis of Chr 17.

**Table supplement 8.** The effect of the size and location of PWD/PWD consubspecific intervals on asynapsis of Chr 18.

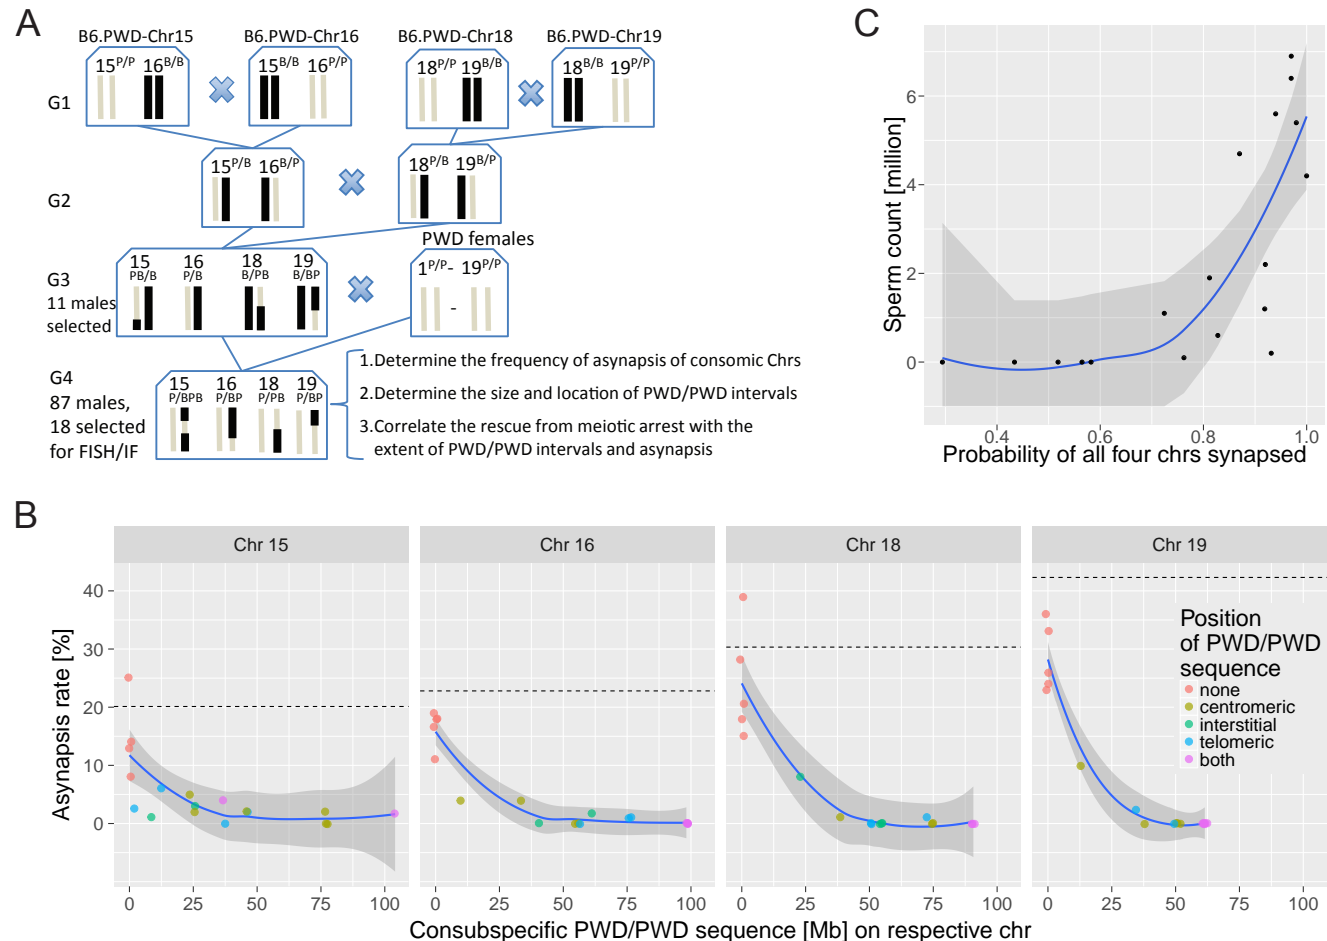

**Figure 3.** The effect of consubspecific PWD/PWD stretches of genomic sequence on pachytene synapsis and meiotic progression, 4-chr cross. (A) Scheme of a four-generation cross resulting in F1 hybrids with four recombinant consomic chromosomes. (B) The asynapsis rate related to the size and chromosomal position of the consubspecific PWD/PWD sequence in four consomic chromosomes (15, 16, 18 and 19, see also Table 1). The localization of PWD homozygous sequence with respect to centromere, interstitial part of the chromosome, telomere, or on both ends is distinguished by color (see also Tables 1). (C) Number of sperm in epididymis is a function of probability of synapsis of all four consomic chromosomes. The complete meiotic arrest is reversed in males having 70% or higher chance of all four chromosomes synapsed. See also Table Supplement 11. Loess curve with 95% CI.

The following table and figure supplements are available for figure 3.

**Table supplement 9.** Change point estimates of the minimal length [Mb] of PWD/PWD homozygosity showing detectable affect on synapsis rate.

**Table supplement 10.** Eleven G3 male parents selected for the 4-chr cross experiment.

**Table supplement 11.** The fertility parameters of hybrids of the 4-chr cross experiment.

**Table supplement 12.** Four-chr cross. The effect of the size and location of PWD/PWD consubspecific intervals on asynapsis of Chrs 15, 16, 18 and 19 and on fertility parameters.

**Figure supplement 2.** The fertility parameters of hybrids of the 4-chr cross experiment.

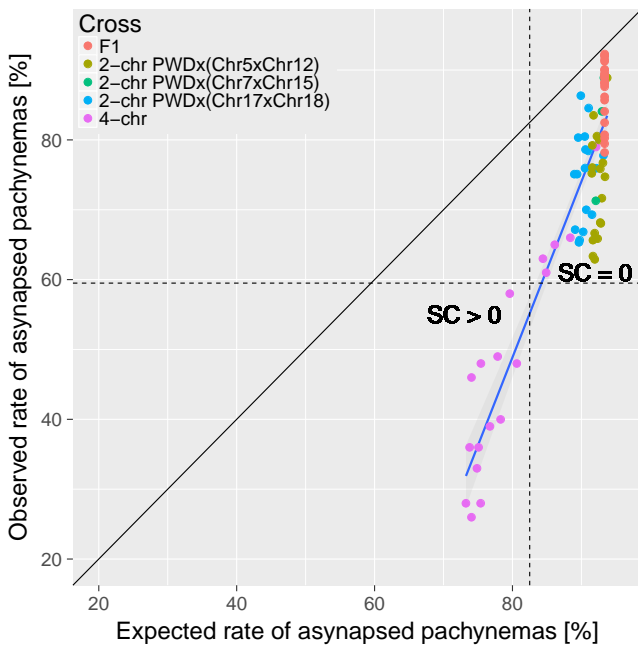

**Figure 4.** The trans-acting effect of consubspecific PWD/PWD stretches increases the probability of full synapsis of PWD/B6 heterosubspecific homologs in males 2-chr cross and 4-chr cross experiments. The expected rate of synapsed pachynemas was calculated for each mouse in 2-chr cross and 4-chr cross experiments by multiplication of observed synapsis rates (i.e. assuming independence) of FISH analyzed chromosomes (e.g. chrs 15, 16, 18 and 19 in 4-chr cross) and observed PB6F1 synapsis rates of the remaining autosomes. Asynapsis rate was calculated as a complement to synapsis rate. The difference between expected and observed overall asynapsis is most pronounced in 4-chr cross males with the lowest expected overall asynapsis rate. Recovery of spermatogenesis signaled by the presence of sperm in the epididymis occurs when more than 40% of pachynemas are fully synapsed. SC is sperm count. The following table supplement is available for figure 4.

**Table supplement 13.** Four-chr cross experiment. The relation between observed and calculated rate of pachytene asynapsis and fertility parameters.

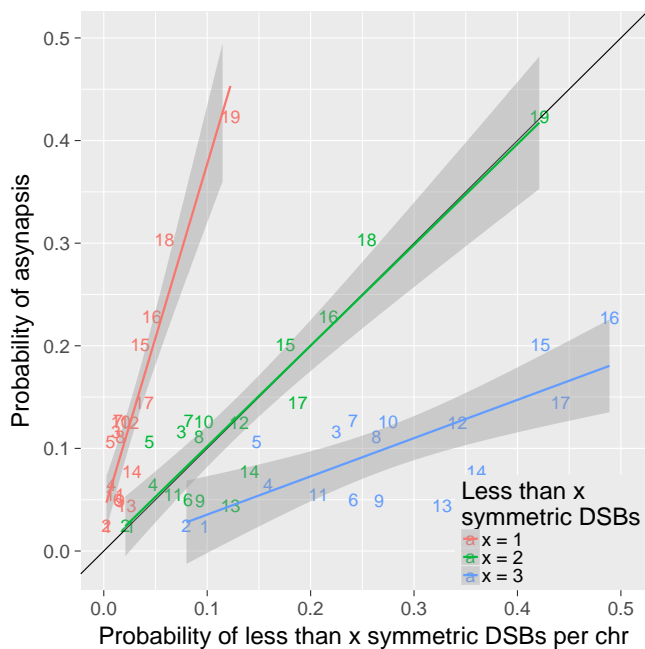

**Figure 5.** Two or more symmetric DSBs can be sufficient for synapsis. The probability of less than 1 symmetric DSBs per chromosome is ~4 times lower than the asynapsis rate observed in PB6F1 hybrid males, (i.e. estimate of probability of asynapsis) implying ~75% of all asynapsis occurs when there is 1 or more repairable DSBs. The probability of less than 2 symmetric DSBs is a good estimate of the probability of asynapsis, while the probability of less than 3 symmetric DSBs overestimates the probability of asynapsis. This shows that in the simplest explanation two or more symmetric DSBs could be sufficient for synapsis. The probabilistic distribution of symmetric DSBs is calculated based on the model described in the Discussion.

The following figure supplements are available for figure 5.

**Figure supplement 4.** Two and more symmetric DSBs can be sufficient for synapsis in 2-chr cross males. See Fig. 5 for details.

**Figure supplement 5.** Two or more symmetric DSBs can be sufficient for synapsis in 4-chr cross hybrid males. See Fig. 5 for details.



## Supplementary Information for

### **Modulation of *Prdm9*-controlled meiotic chromosome asynapsis overrides hybrid sterility in mice**

*Sona Gregorova, Vaclav Gergelits, Irena Chvatalova, Tanmoy Bhattacharyya, Barbora  
Valiskova, Vladana Fotopulosova, Petr Jansa, Diana Wiatrowska, Jiri Forejt*

This Supplementary Information contains the supplementary materials and methods, figure  
supplements and table supplements

## Supplementary Materials and Methods

**Mice, ethics statement.** The project was approved by the Animal Care and use Committee of the Institute of Molecular Genetics AS CR, protocol No 141/2012. The principles of laboratory animal care, Czech Act No. 246/1992 Sb., compatible with EU Council Directive 86/609/EEC and Appendix of the Council of Europe Convention ETS, were observed. SSLP markers used for genotyping consomic chromosomes in 2-chr crosses and 4-chr cross are listed in Table supplement 14.

The PWD/Ph inbred strain originated from a single pair of wild mice of the *Mus musculus musculus* subspecies trapped in 1972 in Central Bohemia, Czech Republic (Gregorova and Forejt, 2000). The C57BL/6J (B6) inbred strain was purchased from The Jackson Laboratory. The panel of 27 chromosome substitution strains C57BL/6J-Chr #PWD (abbreviated B6.PWD-Chr #) was prepared in our laboratory and is maintained by the Institute of Molecular Genetics AS CR, Division BIOCEV, Vestec, Czech Republic, and by The Jackson laboratory, Bar Harbor, Maine, U.S.A. All mice were maintained in a 12-h light/12-h dark cycle in a specific pathogen-free barrier facility. The mice had ad libitum access to a standard rodent diet (ST-1, 3.4% fat; VELA) and water. All males were killed at age 60–70 d.

### Immunostaining and image capture

For immunocytochemistry, the spread nuclei were prepared as described (Anderson et al. 1999) with modifications. Briefly, a single-cell suspension of spermatogenic cells in 0.1M sucrose with Protease inhibitors (Roche) was dropped on 1% paraformaldehyde-treated slides and allowed to settle for 3 hours in a humidified box at 4°C. After brief H<sub>2</sub>O and PBS washing and blocking with 5% goat sera in PBS (vol/vol), the cells were immunolabeled using a standard protocol with the following antibodies: anti-HORMAD2 (1:700, rabbit polyclonal

antibody, gift from Attila Toth) and SYCP3 (1:50, mouse monoclonal antibody, Santa Cruz, #74569). Secondary antibodies were used at 1:500 dilutions and incubated at room temperature for 60 min; goat anti-Rabbit IgG-AlexaFluor568 (MolecularProbes, A-11036) and goat anti-Mouse IgG-AlexaFluor647 (MolecularProbes, A-21235). The images were acquired and examined in a Nikon Eclipse 400 microscope with a motorized stage control using a Plan Fluor objective, 60x (MRH00601; Nikon) and captured using a DS-QiMc monochrome CCD camera (Nikon) and the NIS-Elements program (Nikon). The images were processed using the Adobe Photoshop CS software (Adobe Systems).

### **Combined immunofluorescence staining with DNA FISH or RNA FISH**

XMP XCyting Mouse Chromosome N Whole Painting Probes (Metasystems) were used for DNA FISH analysis of asynapsis of all autosomes, one at a time, as described (Turner et al. 2005), with slight modifications. Testes from 8-week-old mice were dissected and spread meiocyte nuclei were prepared as described previously (Mahadevaiah et al. 2009) with a modification, which relies on reversed sequence of RNA FISH and immunofluorescence staining (Turner et al. 2005). Briefly, after cell fixation and permeabilization, the immunofluorescent labeling was performed for 90 min at 20°C with primary anti HORMAD2 and anti SYCP3 antibodies. Secondary antibodies were selected as above and incubated at room temperature for 60 min. After washing and postfixation steps, the immunostained nuclei were processed with RNA fluorescence in situ hybridization. The Cot-1 DNA biotin-labeled probe was incubated overnight at 37°C, and then the hybridized biotinylated Cot-1 probe was labelled with FITC-avidin conjugate and the fluorescent signal was amplified as described previously (Chaumeil et al, 2008). The images of the immunofluorescence stained

and cot-1 RNA FISH-labeled spread spermatocytes were examined and photographed using confocal microscope DMI6000CEL – Leica TCS SP8.

## Statistics

The effects of the number of Spo11 oligos and the chromosomal length on the asynapsis rate were investigated using a GLMM model. In all the used GLMM models in this work, the asynapsis was modeled as a binary response to fixed effects under investigation and a random intercept for each animal. In F1 hybrids 95 % confidence intervals of observed rate of asynapsed pachynemas and expected rate of asynapsed pachynemas were calculated by bootstrap. The estimates of mean asynapsis rate in respective chromosomes, their standard errors and 95 % confidence intervals were based on GLMM model. In 2-chr crosses and 4-chr cross 95 % confidence intervals of asynapsis rate were constructed based on the likelihood ratio to capture also the uncertainty in the cases when zero asynapsis rate per mouse and chromosome was observed.

Based on the nature of the dependence between the asynapsis rate and the length of consubspecific PWD/PWD region on chromosomes of 2-chr crosses and 4-chr cross, we fitted the data by segmented two-part continuous regression models (Vito et al. 2003)

We fitted the models for all the chromosomes separately (Table supplement 9) being aware of the limitations caused by the lack of animals having specific lengths of consubspecific PWD/PWD region in the respective chromosomes. As the best model describing the dependence of asynapsis rate on the lengths of PWD/PWD intervals we selected piecewise linear models fitting 1) pooled data from 2-chr crosses and 2) pooled data from both 2-chr crosses and 4-chr cross. Those models are not severely affected by the lack of observations with specific lengths of PWD/PWD segment nor by outliers.

All calculations were performed in R 3.2.2, the change point models and GLMM models were fitted using the packages segmented and lme4, respectively (Vito et al. 2008, Douglas et al. 2015).

Gregorova S, Forejt J (2000) PWD/Ph and PWK/Ph inbred mouse strains of *Mus m. musculus* subspecies--a valuable resource of phenotypic variations and genomic polymorphisms. *Folia Biol (Praha)* **46**: 31-41

Anderson LK, Reeves A, Webb LM, Ashley T (1999) Distribution of crossing over on mouse synaptonemal complexes using immunofluorescent localization of MLH1 protein. *Genetics* 151(4):1569-1579.

Turner JM, Mahadevaiah SK, Fernandez-Capetillo O, Nussenzweig A, Xu X, Deng CX, Burgoyne PS (2005) Silencing of unsynapsed meiotic chromosomes in the mouse. *Nat Genet*;37(1):41–47.

Chaumeil J, Augui S, Cow JC, and Heard E (2008) Combined immunofluorescence, RNA fluorescent in situ hybridization, and DNA fluorescent in situ hybridization to study chromatin changes, transcriptional activity, nuclear organization, and X-chromosome inactivation. *Methods Mol Biol*;463:297-308.

Mahadevaiah SK, Costa Y, Turner JM (2009) Using RNA FISH to study gene expression during mammalian meiosis. In: Keeney S (ed) *Meiosis*, vol volume 2, cytological methods. *Methods in molecular biology*. Humana, New York, pp 433–444.

Bhattacharyya T, *et al.* (2013) Mechanistic basis of infertility of mouse intersubspecific hybrids. *Proceedings of the National Academy of Sciences of the United States of America* 110(6):E468-477.

Lange J, *et al.* (2016) The Landscape of Mouse Meiotic Double-Strand Break Formation, Processing, and Repair. *Cell* 167(3):695-708 e616.29,

Davies B, *et al.* (2016) Re-engineering the zinc fingers of PRDM9 reverses hybrid sterility in mice. *Nature* 530(7589):171-+.

Smagulova F, Brick K, Pu YM, Camerini-Otero RD, & Petukhova GV (2016) The evolutionary turnover of recombination hot spots contributes to speciation in mice (vol 30, pg 266, 2016). *Genes & development* 30(7):871-871.

Vito MR, Muggeo (2003). Estimating regression models with unknown break-points. *Statistics in Medicine*, 22, 3055-3071.

Vito MR Muggeo (2008). Segmented: an R Package to Fit Regression Models with Broken-Line Relationships. *R News*, 8/1, 20-25. URL <https://cran.r-project.org/doc/Rnews/>.

Bates D, Maechler M, Bolker B, Walker S (2015). Fitting Linear Mixed-Effects Models Using lme4. *Journal of Statistical Software*, 67(1), 1-48.<doi:10.18637/jss.v067.i01>

**A**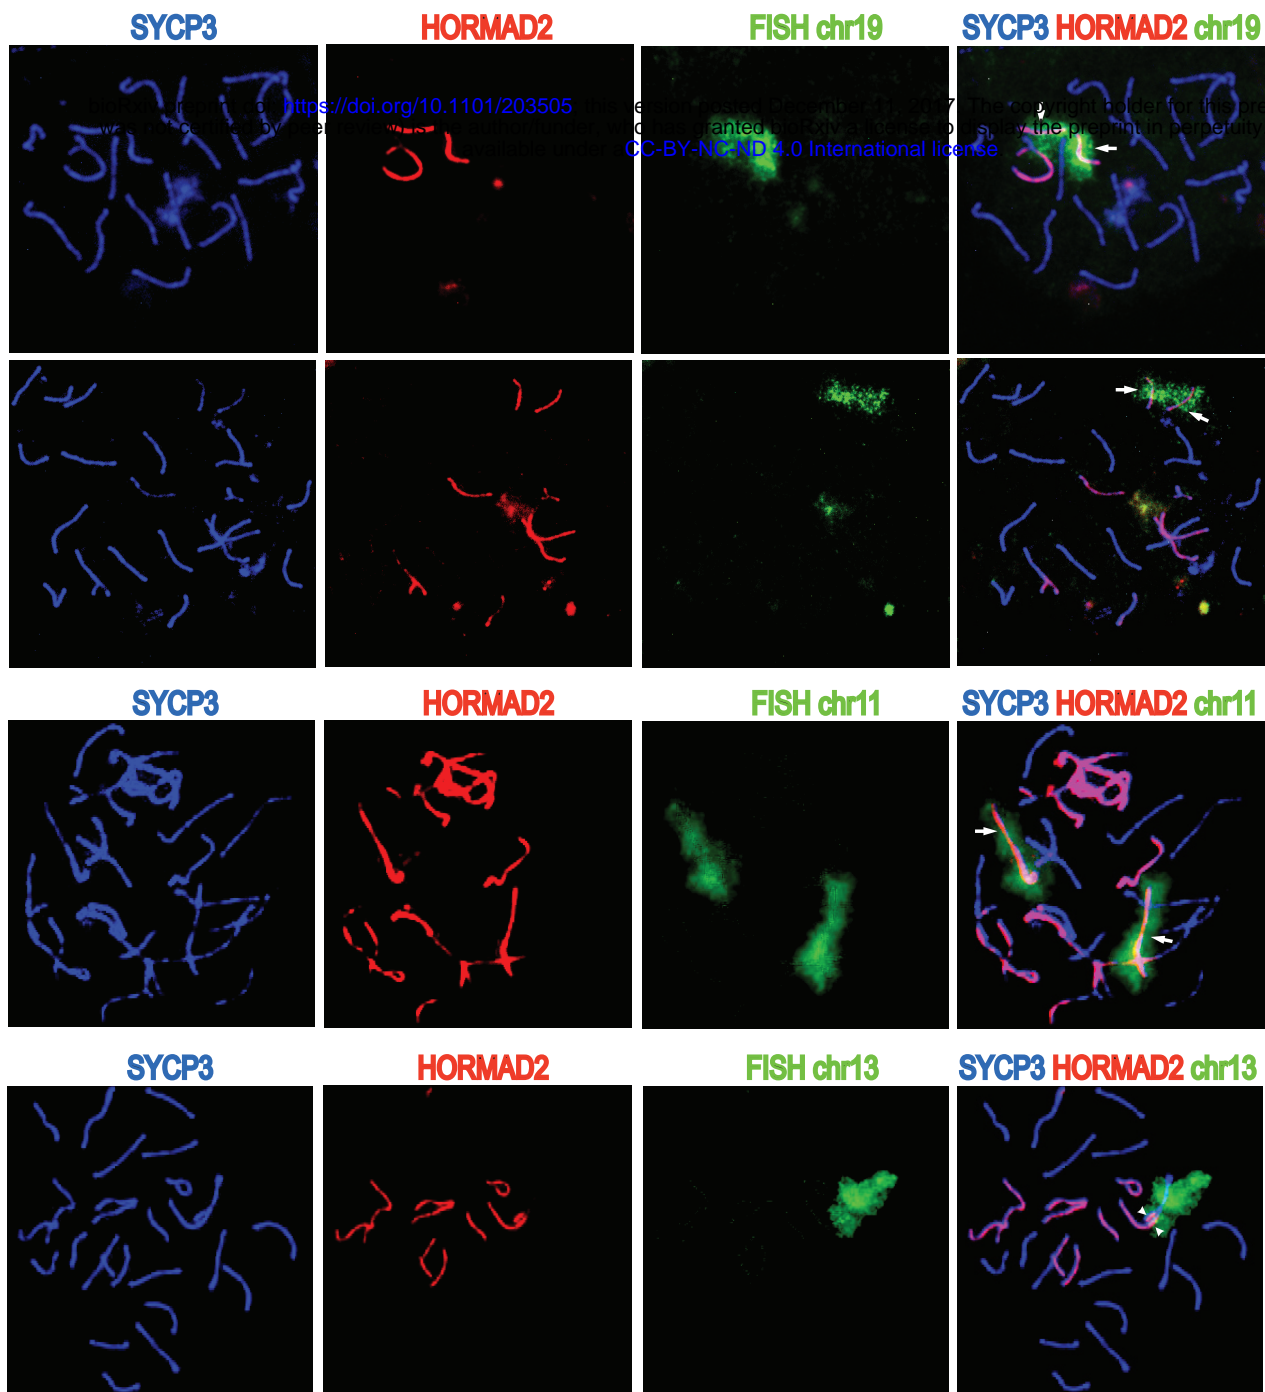**B**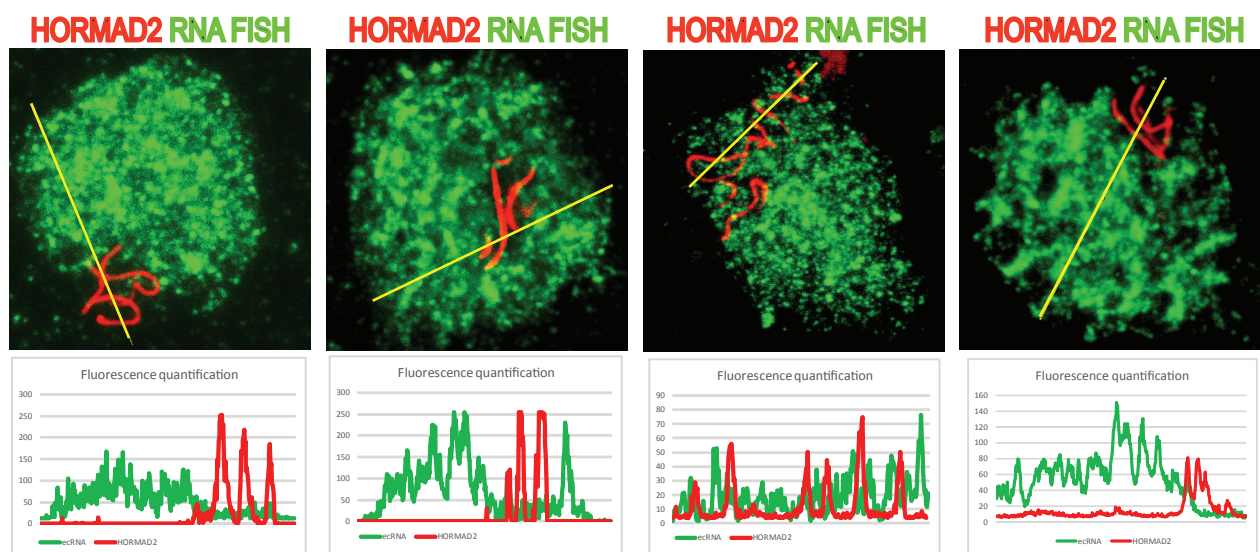

**Figure supplement 1.** Asynapsis of heterosubspecific homologs in PB6F1 pachynemas. (A) Partial (arrowheads) and complete (arrows) asynapsis of Chr 19, 11 and 13. HORMAD2-labeled chromosomes with synapsis defects often form tangles via nonhomologous pairing. (B) Asynapsed chromosomes are embedded in transcriptionally silenced chromatin visualized by the lack of ecrRNA detected by Cot1 RNA FISH See also video 1.

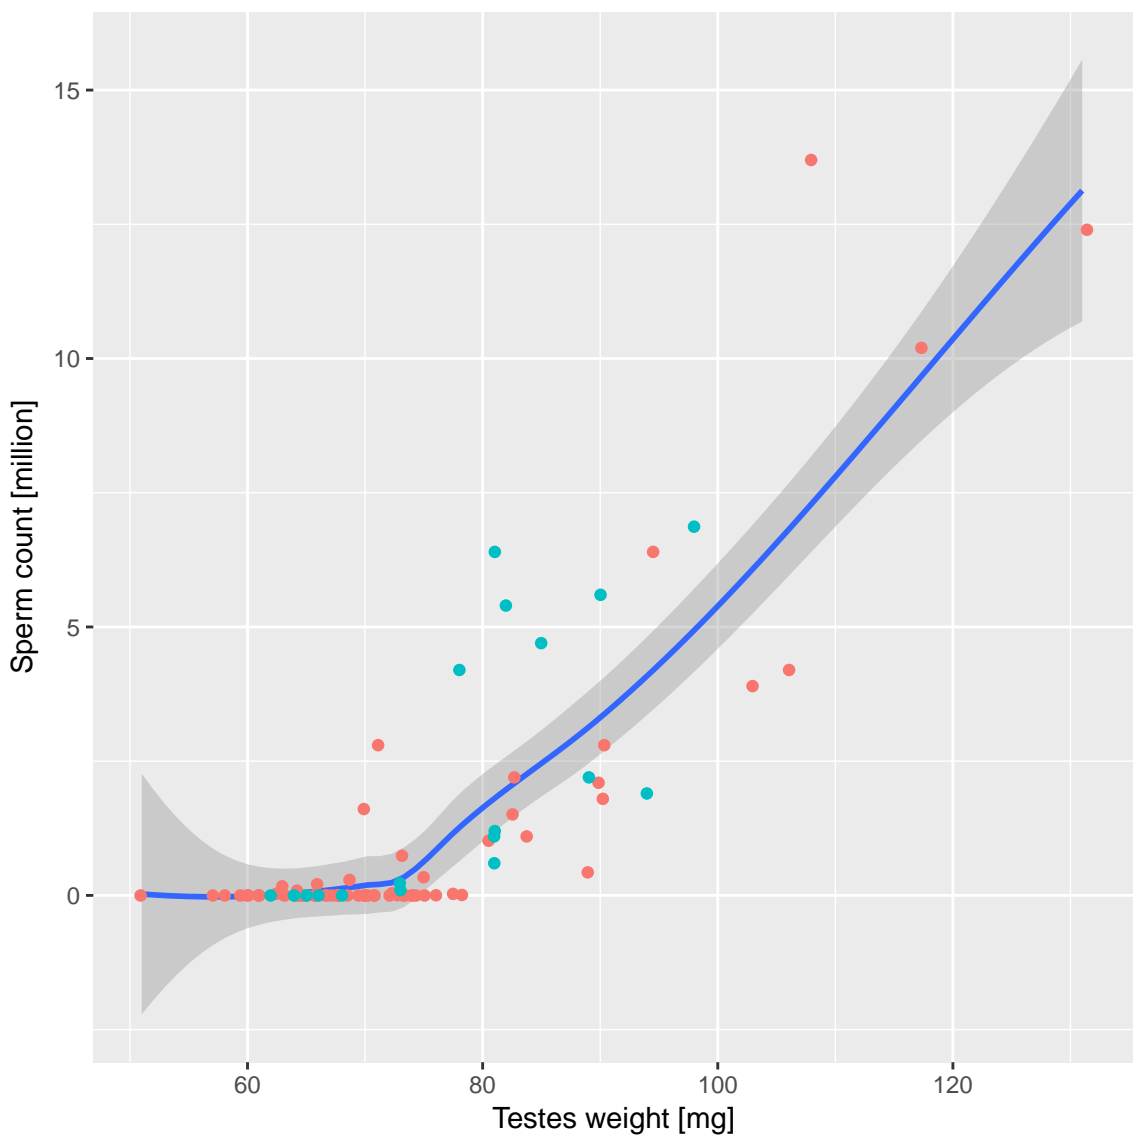

**Figure supplement 2.** Fertility parameters of G4 males from the 4-chr cross. Rescue of HS meiotic arrest is detectable in males with the weight of paired testes >70 mg and >0.1 x 10<sup>6</sup> of sperm in the epididymis. The males selected for DNA FISH/HORMAD2 analysis of asynapsis are highlighted in turquoise. All males share the sterility-determining allelic combination of *Prdm9*<sup>PWD/B6</sup> and *Hstx2*<sup>PWD</sup>. Loess curve with 95% CI.



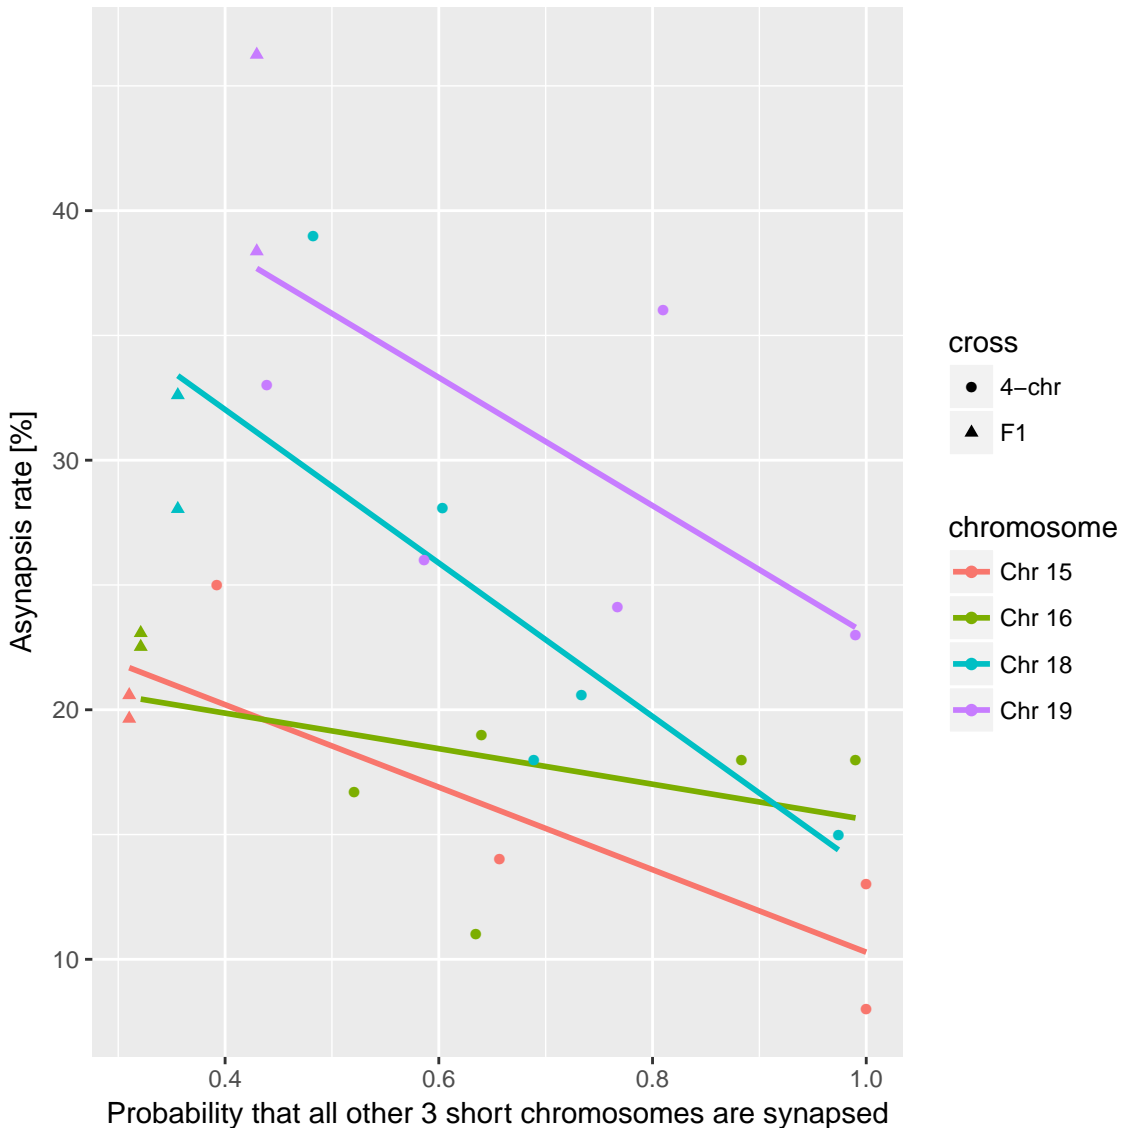

**Figure supplement 3.** Asynapsis rate of individual nonrecombinant consomic PWD/B6 chromosomes modified in trans by the probability of synapsis of the remaining 3 consomic chromosomes in 4-chr cross in individual males compared to PB6F1 hybrids. Asynapsis rate of a given chromosome is in negative correlation ( $r = -0.88, -0.45, -0.80, -0.67$  for Chrs 15, 16, 18, 19 respectively) with the probability that all other 3 analyzed chromosomes are synapsed. The slope of linear regression is  $\beta_{3\_chrs\_syn} = -0.19$ , overall  $P = 0.0003$ .

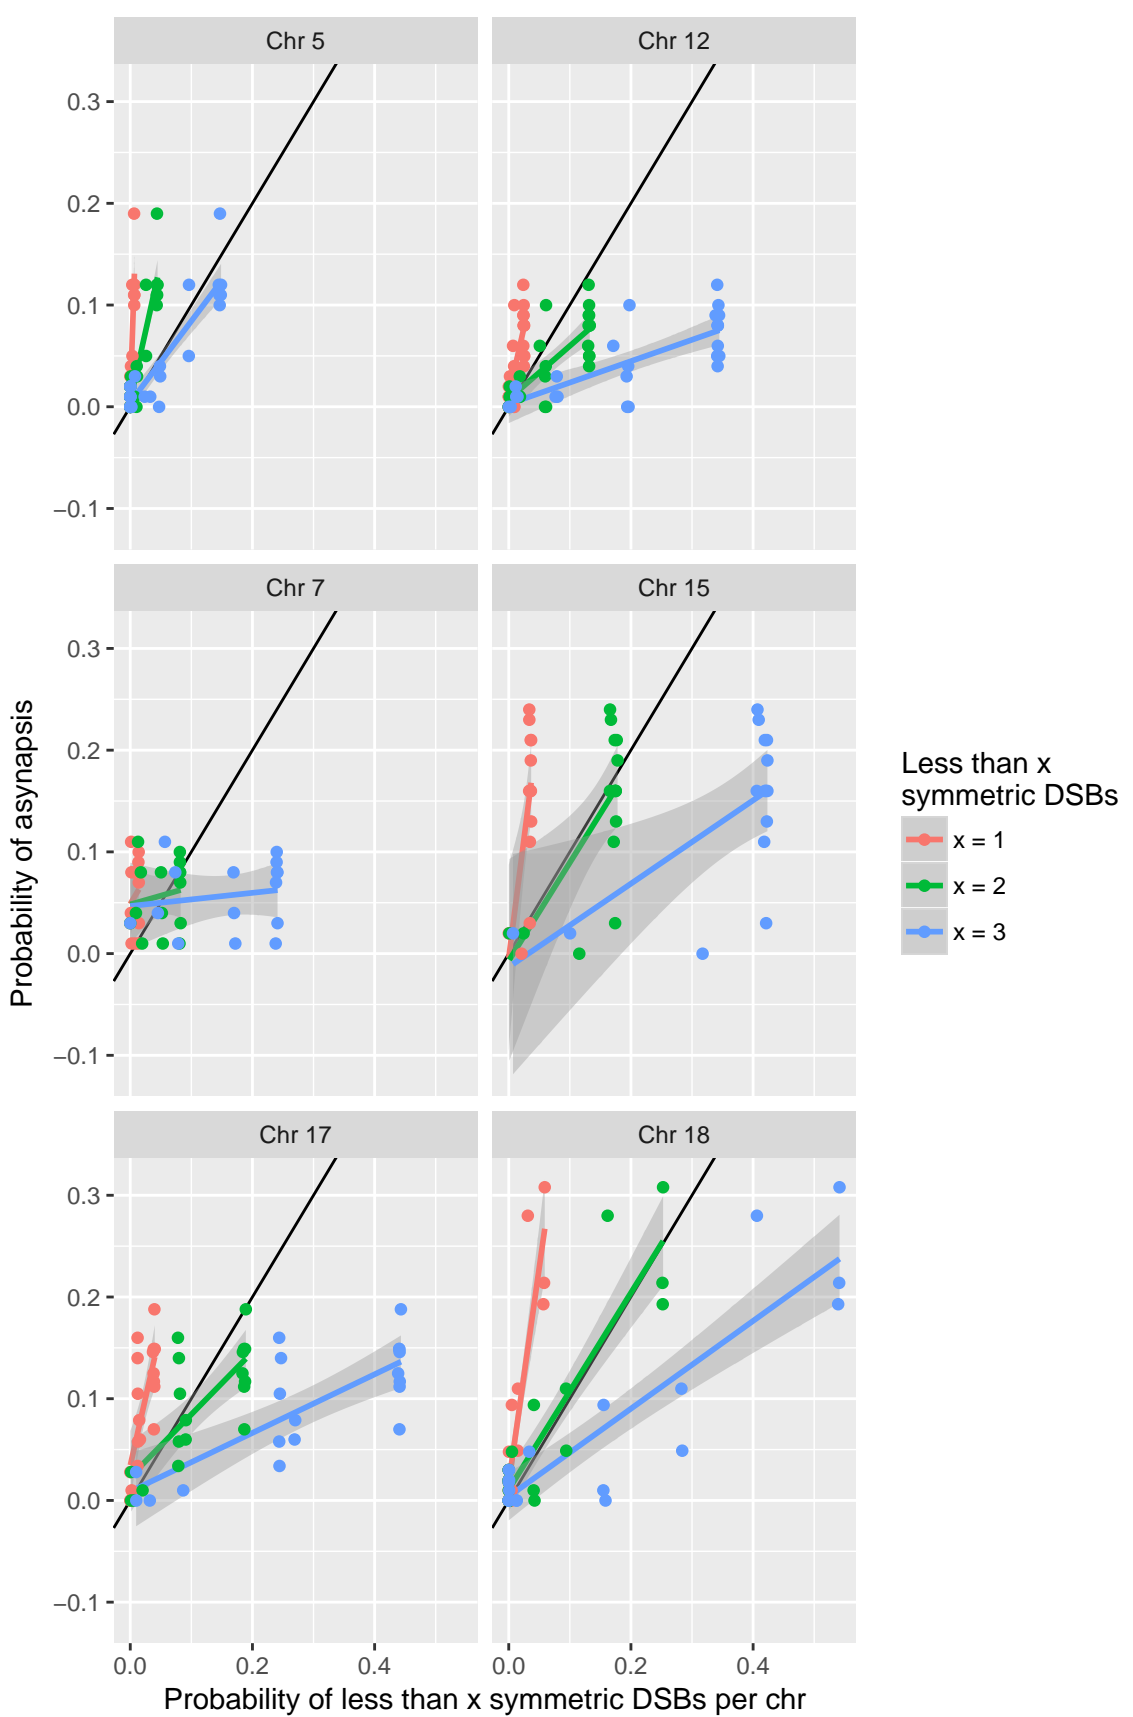

**Figure supplement 4.** Two and more symmetric DSBs can be sufficient for synapsis in 2-chr cross males. See Fig. 5 for details.

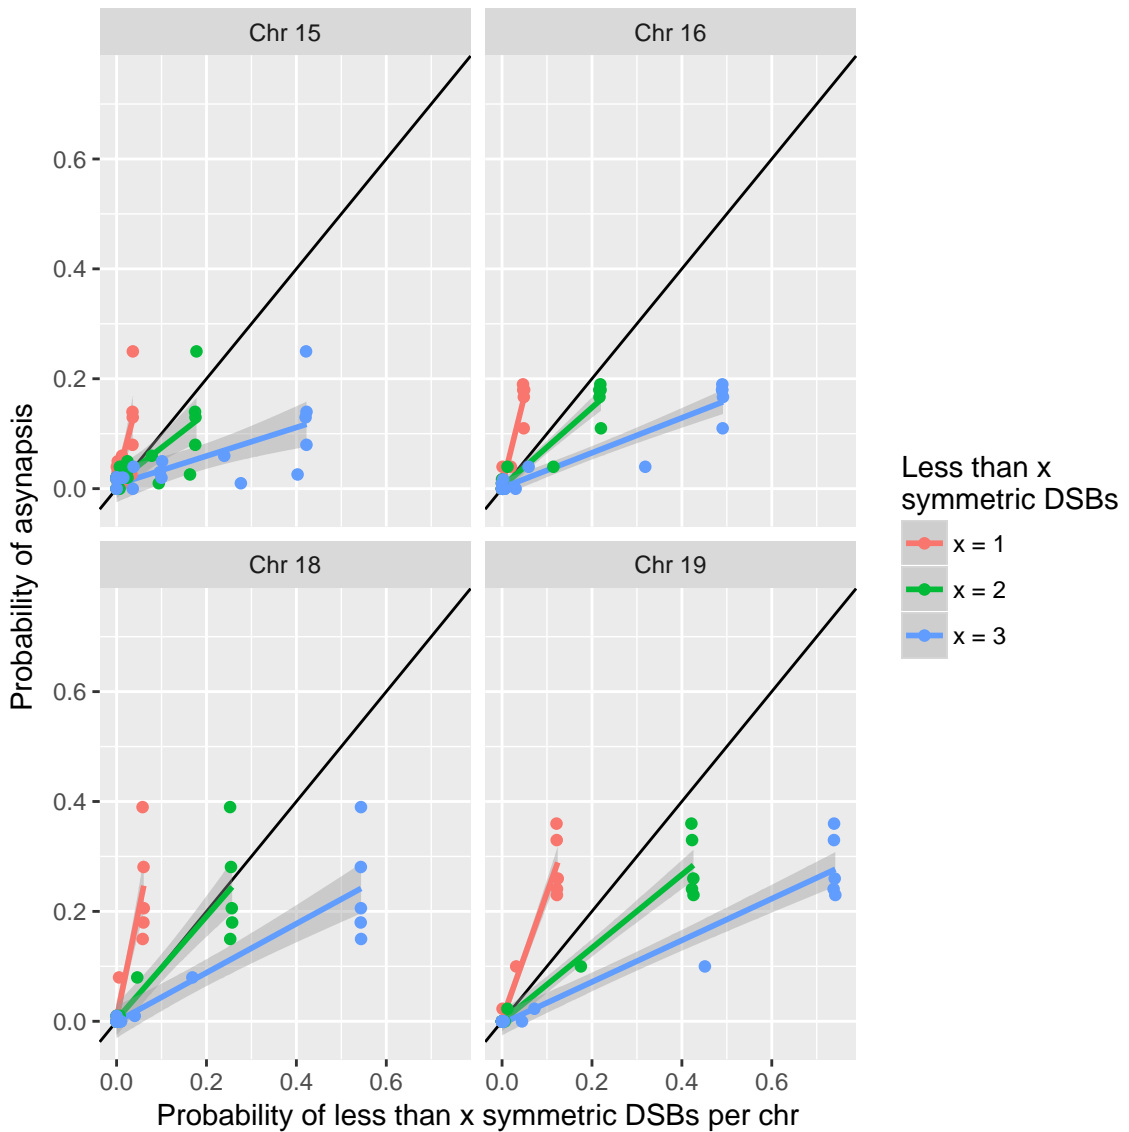

**Figure supplement 5.** Two or more symmetric DSBs can be sufficient for synapsis in 4-chr cross hybrid males. See Fig. 5 for details.

Table supplement 1. Asynapsis rate of individual chromosomes of (PWD x B6)F1 hybrid males

| Chromosome | Asynapsis | Asynapsis  | Synapsis | Complete Asynapsis | Partial Asynapsis | Intermingled Asynapsis | Number of Males per Chr | Analyzed cells | Complete Asynapsis | Partial Asynapsis | Intermingled Asynapsis |
|------------|-----------|------------|----------|--------------------|-------------------|------------------------|-------------------------|----------------|--------------------|-------------------|------------------------|
| Name       | Mean [%]  | 95% CI     | Mean [%] | Mean [%]           | Mean [%]          | Mean [%]               | N                       | n, per male    | n, per male        | n, per male       | n, per male            |
| chr1       | 2,6       | 1.2; 5.8   | 97,4     | 0,4                | 2,2               | 0,0                    | 2                       | 125; 102       | 1; 0               | 5; 0              | 0; 0                   |
| chr2       | 2,7       | 1.3; 5.6   | 97,3     | 1,6                | 1,2               | 0,0                    | 2                       | 103; 152       | 1; 3               | 0; 3              | 0; 0                   |
| chr3       | 11,6      | 7.8; 16.8  | 88,4     | 6,5                | 2,5               | 2,5                    | 2                       | 81; 118        | 4; 9               | 2; 3              | 4; 1                   |
| chr4       | 6,5       | 3.9; 10.7  | 93,5     | 0,5                | 4,6               | 1,4                    | 2                       | 110; 105       | 1; 0               | 7; 3              | 2; 1                   |
| chr5       | 10,6      | 7.6; 14.6  | 89,4     | 8,3                | 1,3               | 1,0                    | 3                       | 85; 89; 129    | 6; 9; 10           | 0; 3; 1           | 0; 2; 1                |
| chr6       | 5,1       | 2.7; 9.6   | 94,9     | 1,1                | 4,0               | 0,0                    | 2                       | 70; 105        | 1; 1               | 2; 5              | 0; 0                   |
| chr7       | 12,8      | 8.8; 18.2  | 87,2     | 8,7                | 4,1               | 0,0                    | 2                       | 94; 102        | 10; 7              | 2; 6              | 0; 0                   |
| chr8       | 10,7      | 7.3; 15.4  | 89,3     | 3,6                | 7,1               | 0,0                    | 2                       | 93; 132        | 3; 5               | 10; 6             | 0; 0                   |
| chr9       | 5,0       | 2.8; 8.8   | 95,0     | 0,5                | 4,5               | 0,0                    | 2                       | 107; 113       | 0; 1               | 3; 7              | 0; 0                   |
| chr10      | 12,6      | 8.8; 17.6  | 87,4     | 4,9                | 5,8               | 1,8                    | 2                       | 114; 109       | 8; 3               | 3; 10             | 2; 2                   |
| chr11      | 5,9       | 3.4; 10.2  | 94,1     | 1,0                | 1,5               | 3,5                    | 2                       | 126; 76        | 2; 0               | 2; 1              | 5; 2                   |
| chr12      | 12,6      | 8.5; 18.2  | 87,4     | 10,4               | 2,2               | 0,0                    | 2                       | 92; 91         | 10; 9              | 2; 2              | 0; 0                   |
| chr13      | 4,4       | 2.6; 7.4   | 95,6     | 3,5                | 1,0               | 0,0                    | 3                       | 112; 106; 97   | 3; 4; 4            | 2; 0; 1           | 0; 0; 0                |
| chr14      | 7,8       | 5.2; 11.7  | 92,2     | 1,9                | 4,8               | 1,1                    | 2                       | 129; 139       | 4; 1               | 3; 10             | 0; 3                   |
| chr15      | 20,1      | 15.3; 26.0 | 79,9     | 15,0               | 4,7               | 0,5                    | 2                       | 102; 112       | 18; 14             | 3; 7              | 0; 1                   |
| chr16      | 22,8      | 17.5; 29.1 | 77,2     | 15,3               | 6,4               | 1,0                    | 2                       | 111; 91        | 16; 15             | 7; 6              | 2; 0                   |
| chr17      | 14,6      | 10.4; 20.1 | 85,4     | 12,1               | 2,4               | 0,0                    | 2                       | 111; 95        | 12; 13             | 5; 0              | 0; 0                   |
| chr18      | 30,5      | 24.1; 37.7 | 69,5     | 29,9               | 0,6               | 0,0                    | 2                       | 92; 82         | 29; 23             | 1; 0              | 0; 0                   |
| chr19      | 42,2      | 34.9; 49.8 | 57,8     | 39,8               | 2,4               | 0,0                    | 2                       | 80; 86         | 36; 30             | 1; 3              | 0; 0                   |

Synapsis and classes of asynapsis are based on the GLMM model to take into account the unequal numbers of cells analyzed per males.

Table supplement 3. Two-chr cross. The effect of the size and location of PWD/PWD conspecific intervals on asynapsis of Chr 5 and on fertility parameters.

| Male ID | Distance from the centromere of Chr 5 (total length 151.8 Mb) |     |     |      |      |      |      |      |       |       |       |       |       |       |       |       | PWD/PWD length<br>Mb, range | Asynapsis of Chr 5 |            | Cells analyzed<br>N | Testes weight<br>mg | Sperm count<br>10 <sup>6</sup> |
|---------|---------------------------------------------------------------|-----|-----|------|------|------|------|------|-------|-------|-------|-------|-------|-------|-------|-------|-----------------------------|--------------------|------------|---------------------|---------------------|--------------------------------|
|         | 4,9                                                           | 5,2 | 9,8 | 24,5 | 28,1 | 45,0 | 61,4 | 64,1 | 107,0 | 119,0 | 125,4 | 127,0 | 127,7 | 132,1 | 137,7 | 151,0 |                             | %                  | 95 % CI    |                     |                     |                                |
| 69064   | PP                                                            | PP  | PP  | PP   | PP   | PP   | PP   | PP   | PP    | PP    | PP    | PP    | PP    | PP    | PP    | PP    | 151.8; 151.8                | 2,0                | 0.3; 6.0   | 100                 | 54,0                | 0,0                            |
| 69133   | PP                                                            | PP  | PP  | PP   | PP   | PP   | PP   | PP   | PP    | PP    | PP    | PP    | PP    | PP    | PP    | PP    | 151.8; 151.8                | 2,0                | 0.3; 6.0   | 100                 | 64,0                | 0,0                            |
| 67974   | PB                                                            | PB  | PB  | PB   |      | PP   | PP   | PP   | PP    | PP    | PP    | PP    | PP    | PP    | PP    | PP    | 106.8; 123.7                | 0,0                | 0.0; 2.4   | 83                  | 69,0                | 0,0                            |
| 69083   | PB                                                            | PB  | PB  | PB   | PB   |      | PP   | PP   | PP    | PP    | PP    | PP    | PP    | PP    | PP    | PP    | 90.4; 106.8                 | 1,0                | 0.1; 4.3   | 100                 | 63,0                | 0,0                            |
| 67730   | PB                                                            | PB  | PB  | PB   | PB   |      | PP   | PP   | PP    | PP    | PP    | PP    | PP    | PP    | PP    | PP    | 90.4; 106.8                 | 0,0                | 0.0; 2.0   | 99                  | 57,0                | 0,0                            |
| 67878   | PB                                                            | PB  | PB  | PB   | PB   | PB   |      | PP   | PP    | PP    | PP    | PP    | PP    | PP    | PP    | PP    | 87.7; 90.4                  | 1,0                | 0.1; 4.3   | 100                 | 58,0                | 0,0                            |
| 67882   | PB                                                            | PB  | PB  | PB   | PB   | PB   |      | PB   |       | PP    | PP    | PP    | PP    | PP    | PP    | PP    | 44.8; 87.7                  | 2,0                | 0.3; 6.0   | 100                 | 59,0                | 0,0                            |
| 67876   | PB                                                            | PB  | PB  | PB   | PB   | PB   |      | PP   | PP    |       | PB    | PB    | PB    | PB    | PB    | PB    | 54.9; 64.0                  | 0,0                | 0.0; 2.0   | 100                 | 69,0                | 0,0                            |
| 69062   | PB                                                            | PB  | PB  | PB   | PB   | PB   | PB   |      | PP    | PP    | PP    | PP    | PP    | PP    | PP    | PP    | 44.8; 87.7                  | 1,0                | 0.1; 4.3   | 100                 | 58,0                | 0,0                            |
| 67973   | PB                                                            | PB  | PB  | PB   | PB   | PB   | PB   | PB   |       | PP    | PP    | PP    | PP    | PP    | PP    | PP    | 32.8; 44.8                  | 3,0                | 0.8; 7.6   | 100                 | 67,0                | 0,0                            |
| 69137   | PB                                                            | PB  | PB  | PB   | PB   | PB   | PB   | PB   | PB    | PB    | PB    | PB    |       | PP    | PP    | PP    | 19.7; 24.1                  | 1,0                | 0.1; 4.3   | 100                 | 55,0                | 0,0                            |
| 69846   | PB                                                            | PB  | PB  | PB   | PB   | PB   | PB   | PB   | PB    | PB    | PB    | PB    | PB    |       | PP    | PP    | 14.1; 19.7                  | 3,0                | 0.8; 7.6   | 100                 | NA                  | NA                             |
| 69328   | PB                                                            | PB  | PB  | PB   | PB   | PB   | PB   | PB   | PB    | PB    | PB    | PB    | PB    | PB    |       | PP    | 0.8; 14.1                   | 12,0               | 6.6; 19.3  | 100                 | 82,0                | 0,0                            |
| 69186   | PB                                                            | PB  | PB  | PB   | PB   | PB   | PB   | PB   | PB    | PB    | PB    | PB    | PB    | PB    |       | PP    | 0.8; 14.1                   | 5,0                | 1.8; 10.4  | 100                 | 66,0                | 0,0                            |
| 69138   | PB                                                            | PB  | PB  | PB   | PB   | PB   | PB   | PB   | PB    | PB    | PB    | PB    | PB    | PB    | PB    | PB    | 0.0; 0.0                    | 19,0               | 12.1; 27.4 | 100                 | 55,0                | 0,0                            |
| 69184   | PB                                                            | PB  | PB  | PB   | PB   | PB   | PB   | PB   | PB    | PB    | PB    | PB    | PB    | PB    | PB    | PB    | 0.0; 0.0                    | 9,0                | 4.4; 15.6  | 100                 | 74,0                | 0,0                            |
| 69281   | PB                                                            | PB  | PB  | PB   | PB   | PB   | PB   | PB   | PB    | PB    | PB    | PB    | PB    | PB    | PB    | PB    | 0.0; 0.0                    | 11,0               | 5.9; 18.1  | 100                 | 71,0                | 0,0                            |
| 69331   | PB                                                            | PB  | PB  | PB   | PB   | PB   | PB   | PB   | PB    | PB    | PB    | PB    | PB    | PB    | PB    | PB    | 0.0; 0.0                    | 11,0               | 5.9; 18.1  | 100                 | 63,0                | 0,0                            |
| 69440   | PB                                                            | PB  | PB  | PB   | PB   | PB   | PB   | PB   | PB    | PB    | PB    | PB    | PB    | PB    | PB    | PB    | 0.0; 0.0                    | 12,0               | 6.6; 19.3  | 100                 | 68,0                | 0,0                            |
| 69441   | PB                                                            | PB  | PB  | PB   | PB   | PB   | PB   | PB   | PB    | PB    | PB    | PB    | PB    | PB    | PB    | PB    | 0.0; 0.0                    | 10,0               | 5.1; 16.9  | 100                 | 71,0                | 0,0                            |
| 69136   | PP                                                            | PP  | PP  |      | PB   | PB   | PB   | PB   | PB    | PB    | PB    | PB    | PB    | PB    | PB    | PB    | 9.8; 24.5                   | 4,0                | 1.3; 9.0   | 100                 | 61,0                | 0,0                            |
| 69847   | PP                                                            | PP  | PP  |      | PB   | PB   | PB   | PB   | PB    | PB    | PB    | PB    | PB    | PB    | PB    | PB    | 9.8; 24.5                   | 0,0                | 0.0; 2.0   | 100                 | NA                  | NA                             |
| 67877   | PP                                                            | PP  | PP  | PP   |      | PB   | PB   | PB   | PB    | PB    | PB    | PB    | PB    | PB    | PB    | PB    | 24.5; 28.1                  | 1,0                | 0.1; 4.3   | 100                 | 65,0                | 0,0                            |
| 69082   | PP                                                            | PP  | PP  | PP   | PP   | PP   |      | PB   | PB    | PB    | PB    | PB    | PB    | PB    | PB    | PB    | 45.0; 61.4                  | 0,0                | 0.0; 2.0   | 100                 | 71,0                | 0,0                            |
| 67883   | PP                                                            | PP  | PP  | PP   | PP   | PP   | PP   | PP   |       | PB    | PB    | PB    | PB    | PB    | PB    | PB    | 64.1; 107.0                 | 0,0                | 0.0; 2.0   | 100                 | 62,0                | 0,0                            |
| 67977   | PP                                                            | PP  | PP  | PP   | PP   | PP   | PP   | PP   | PP    | PP    | PP    | PP    | PP    | PP    | PP    |       | 137.7; 151.0                | 1,0                | 0.1; 4.3   | 100                 | 67,0                | 0,0                            |

The minimal and maximal length of PWD/PWD interval was determined by positions of the DNA markers used for genotyping. White and orange intervals are heterozygous PWD/B6 and homozygous PWD/PWD, respectively. Recombination breaks are located in gray intervals. Sperm count refers to the number of sperm cells in both epididymis, TW is the wet weight of paired testes in milligrams.

Table supplement 4. Two-chr cross. The effect of the size and location of PWD/PWD conspecific intervals on asynapsis of Chr 12 and on fertility parameters.

| Male ID | Distance from centromere of Chr 12 (total length 120.1 Mb) |     |      |      |      |      |      |      |       |       | PWD/PWD length<br>Mb, range | Asynapsis of Chr 12 |           | Cells analyzed<br>N | Testes weight<br>mg | Sperm count<br>10 <sup>6</sup> |
|---------|------------------------------------------------------------|-----|------|------|------|------|------|------|-------|-------|-----------------------------|---------------------|-----------|---------------------|---------------------|--------------------------------|
|         | 5,4                                                        | 7,6 | 15,7 | 19,8 | 30,8 | 35,0 | 54,6 | 91,0 | 103,4 | 113,8 |                             | %                   | 95% CI    |                     |                     |                                |
| 69064   | PP                                                         | PP  | PP   | PP   | PP   | PP   | PP   | PP   | PP    | PB    | 91.0; 103.4                 | 0,0                 | 0.0; 2.0  | 100                 | 54,0                | 0,0                            |
| 67977   | PB                                                         | PB  | PB   | PB   | PB   | PB   | PP   | PP   | PP    | PB    | 48.8; 78.8                  | 0,0                 | 0.0; 2.0  | 100                 | 67,0                | 0,0                            |
| 67876   | PP                                                         | PP  | PP   | PP   | PP   | PP   | PB   | PB   | PB    | PB    | 35.0; 54.6                  | 1,0                 | 0.1; 4.3  | 100                 | 69,0                | 0,0                            |
| 69144   | PP                                                         | PP  | PP   | PP   | PB   | PB   | PB   | PB   | PP    | PP    | 36.5; 59.9                  | 1,0                 | 0.1; 4.3  | 100                 | 66,0                | 0,0                            |
| 69760   | PP                                                         | PP  | PP   | PP   | PB   | PB   | PB   | PB   | PB    | PB    | 19.8; 30.8                  | 1,0                 | 0.1; 4.3  | 100                 | 65,0                | 0,0                            |
| 69133   | PP                                                         | PP  | PP   | PP   | PB   | PB   | PB   | PB   | PB    | PB    | 19.8; 30.8                  | 3,0                 | 0.8; 7.6  | 100                 | 64,0                | 0,0                            |
| 67973   | PP                                                         | PP  | PP   | PP   | PB   | PB   | PB   | PB   | PB    | PB    | 12.2; 25.4                  | 6,0                 | 2.4; 11.8 | 100                 | 67,0                | 0,0                            |
| 69281   | PP                                                         | PP  | PB   | PB   | PB   | PB   | PB   | PB   | PB    | PB    | 7.6; 15.7                   | 4,0                 | 1.3; 9.0  | 100                 | 71,0                | 0,0                            |
| 67974   | PB                                                         | PB  | PB   | PB   | PB   | PB   | PB   | PB   | PB    | PB    | 0.0; 0.0                    | 10,0                | 5.1; 16.9 | 100                 | 69,0                | 0,0                            |
| 69136   | PB                                                         | PB  | PB   | PB   | PB   | PB   | PB   | PB   | PB    | PB    | 0.0; 0.0                    | 9,0                 | 4.4; 15.6 | 100                 | 61,0                | 0,0                            |
| 69138   | PB                                                         | PB  | PB   | PB   | PB   | PB   | PB   | PB   | PB    | PB    | 0.0; 0.0                    | 9,0                 | 4.4; 15.6 | 100                 | 55,0                | 0,0                            |
| 69184   | PB                                                         | PB  | PB   | PB   | PB   | PB   | PB   | PB   | PB    | PB    | 0.0; 0.0                    | 8,0                 | 3.7; 14.4 | 100                 | 71,0                | 0,0                            |
| 69282   | PB                                                         | PB  | PB   | PB   | PB   | PB   | PB   | PB   | PB    | PB    | 0.0; 0.0                    | 6,0                 | 2.4; 11.8 | 100                 | 67,0                | 0,0                            |
| 69328   | PB                                                         | PB  | PB   | PB   | PB   | PB   | PB   | PB   | PB    | PB    | 0.0; 0.0                    | 12,0                | 6.6; 19.3 | 100                 | 66,0                | 0,0                            |
| 69331   | PB                                                         | PB  | PB   | PB   | PB   | PB   | PB   | PB   | PB    | PB    | 0.0; 0.0                    | 5,0                 | 1.8; 10.4 | 100                 | 63,0                | 0,0                            |
| 69441   | PB                                                         | PB  | PB   | PB   | PB   | PB   | PB   | PB   | PB    | PB    | 0.0; 0.0                    | 8,0                 | 3.7; 14.4 | 100                 | 68,0                | 0,0                            |
| 69663   | PB                                                         | PB  | PB   | PB   | PB   | PB   | PB   | PB   | PB    | PB    | 0.0; 0.0                    | 4,0                 | 1.3; 9.0  | 100                 | 70,0                | 0,0                            |
| 69664   | PB                                                         | PB  | PB   | PB   | PB   | PB   | PB   | PB   | PB    | PB    | 0.0; 0.0                    | 8,0                 | 3.7; 14.4 | 100                 | 71,0                | 0,0                            |
| 69847   | PB                                                         | PB  | PB   | PB   | PB   | PB   | PB   | PB   | PB    | PB    | 0.0; 0.0                    | 5,0                 | 1.8; 10.4 | 100                 | 63,0                | 0,0                            |
| 69186   | PB                                                         | PB  | PB   | PB   | PB   | PB   | PB   | PB   | PP    | PP    | 6.3; 16.7                   | 10,0                | 5.1; 16.9 | 100                 | 82,0                | 0,0                            |
| 69763   | PB                                                         | PB  | PB   | PB   | PB   | PB   | PB   | PB   | PP    | PP    | 6.3; 16.7                   | 3,0                 | 0.8; 7.6  | 100                 | 68,0                | 0,0                            |
| 69427   | PB                                                         | PB  | PB   | PB   | PB   | PB   | PB   | PB   | PP    | PP    | 6.3; 16.7                   | 0,0                 | 0.0; 2.0  | 100                 | 68,0                | 0,0                            |
| 69082   | PB                                                         | PB  | PB   | PB   | PB   | PB   | PB   | PB   | PP    | PP    | 6.3; 16.7                   | 0,0                 | 0.0; 2.0  | 100                 | 71,0                | 0,0                            |
| 69062   | PB                                                         | PB  | PB   | PB   | PB   | PB   | PP   | PP   | PP    | PP    | 29.1; 65.5                  | 2,0                 | 0.3; 6.0  | 100                 | 59,0                | 0,0                            |
| 69083   | PB                                                         | PB  | PB   | PB   | PB   | PB   | PP   | PP   | PP    | PP    | 29.1; 65.5                  | 1,0                 | 0.1; 4.3  | 100                 | 57,0                | 0,0                            |

The minimal and maximal length of PWD/PWD interval was determined by positions of the DNA markers used for genotyping. White and orange intervals are heterozygous PWD/B6 and homozygous PWD/PWD, respectively. Recombination breaks are located in gray intervals.

Sperm count refers to the number of sperm cells in both epididymis, TW is the wet weight of paired testes in milligrams.

Table supplement 5. Two-chr cross. The effect of the size and location of PWD/PWD conspecific intervals on asynapsis of Chr 7 and on fertility parameters

| Male ID | Distance from the centromere of Chr 7 (total length 145.4 Mb) |      |      |      |      |      |       |       |       | PWD/PWD length |      | Asynapsis of Chr 5 |     | Cells analyzed | Testes weight   | Sperm count |
|---------|---------------------------------------------------------------|------|------|------|------|------|-------|-------|-------|----------------|------|--------------------|-----|----------------|-----------------|-------------|
|         | 3,3                                                           | 18,0 | 24,6 | 25,7 | 30,3 | 87,5 | 119,7 | 131,0 | 144,7 | Mb, range      | %    | 95% CI             | N   | mg             | 10 <sup>6</sup> |             |
| 69468   | PP                                                            | PP   | PP   | PP   |      | PB   | PB    |       | PP    | 26.4; 44.7     | 4,0  | 1.3; 9.0           | 100 | 56,0           | 0,0             |             |
| 69745   | PP                                                            | PP   | PP   |      | PB   | PB   | PB    | PB    | PB    | 24.6; 25.7     | 11,0 | 5.9; 18.1          | 100 | 64,0           | 0,0             |             |
| 69744   | PP                                                            | PP   |      | PB   | PB   | PB   | PB    | PB    | PB    | 18.0; 24.6     | 8,0  | 3.7; 14.4          | 100 | 65,0           | 0,0             |             |
| 69934   | PB                                                            | PB   | PB   | PB   | PB   | PB   | PB    | PB    | PB    | 0.0; 0.0       | 10,0 | 5.1; 16.9          | 100 | 68,0           | 0,0             |             |
| 69935   | PB                                                            | PB   | PB   | PB   | PB   | PB   | PB    | PB    | PB    | 0.0; 0.0       | 9,0  | 4.4; 15.6          | 100 | 64,0           | 0,0             |             |
| 69878   | PB                                                            | PB   | PB   | PB   | PB   | PB   | PB    | PB    | PB    | 0.0; 0.0       | 8,0  | 3.7; 14.4          | 100 | 65,0           | 0,0             |             |
| 69627   | PB                                                            | PB   | PB   | PB   | PB   | PB   | PB    | PB    | PB    | 0.0; 0.0       | 8,0  | 3.7; 14.4          | 100 | 64,0           | 0,0             |             |
| 69467   | PB                                                            | PB   | PB   | PB   | PB   | PB   | PB    | PB    | PB    | 0.0; 0.0       | 7,0  | 3.1; 13.1          | 100 | 58,0           | 0,0             |             |
| 69626   | PB                                                            | PB   | PB   | PB   | PB   | PB   | PB    | PB    | PB    | 0.0; 0.0       | 3,0  | 0.8; 7.6           | 100 | 63,0           | 0,0             |             |
| 69780   | PB                                                            | PB   | PB   | PB   | PB   | PB   | PB    | PB    | PB    | 0.0; 0.0       | 1,0  | 0.1; 4.3           | 100 | 60,0           | 0,0             |             |
| 69572   | PB                                                            | PB   | PB   | PB   | PB   | PB   | PB    |       | PP    | 0.7; 14.4      | 8,0  | 3.7; 14.4          | 100 | 57,0           | 0,0             |             |
| 37007   | PB                                                            | PB   | PB   | PB   | PB   | PB   | PB    |       | PP    | 0.7; 14.4      | 4,0  | 1.2; 9.1           | 98  | 69,0           | 0,0             |             |
| 69625   | PB                                                            | PB   | PB   | PB   | PB   | PB   | PB    |       | PP    | 0.7; 14.4      | 1,0  | 0.1; 4.3           | 100 | 65,0           | 0,0             |             |
| 69877   | PB                                                            | PB   | PB   | PB   | PB   | PB   |       | PP    | PP    | 14.4; 25.7     | 1,0  | 0.1; 4.3           | 100 | 56,0           | 0,0             |             |
| 69781   | PB                                                            | PB   | PB   |      | PP   | PP   | PP    | PP    |       | 100.7; 119.0   | 3,0  | 0.8; 7.6           | 100 | 62,0           | 0,0             |             |

The minimal and maximal length of PWD/PWD interval was determined by positions of the DNA markers used for genotyping. White and orange intervals are heterozygous PWD/B6 and homozygous PWD/PWD, respectively. Recombination breaks are located in gray intervals.

Sperm count refers to the number of sperm cells in both epididymis, TW is the wet weight of paired testes in milligrams.

Table supplement 6. Two-chr cross. The effect of the size and location of PWD/PWD conspecific intervals on asynapsis of Chr 15 and on fertility parameters.

| Male ID | Distance from centromere of Chr 15 (total length 104.0 Mb) |      |      |      |      |      |       |       |       |       | PWD/PWD length | Asynapsis of Chr 15 |            | Cells analyzed | Testes weight | Sperm count     |
|---------|------------------------------------------------------------|------|------|------|------|------|-------|-------|-------|-------|----------------|---------------------|------------|----------------|---------------|-----------------|
|         | 9,3                                                        | 40,0 | 63,0 | 70,2 | 97,0 | 97,8 | 100,6 | 101,9 | 102,8 | 103,4 | Mb, range      | %                   | 95% CI     | N              | mg            | 10 <sup>6</sup> |
| 69571   | PP                                                         | PP   |      | PB   | PB   | PB   | PB    | PB    | PB    | PB    | 40.0; 63.0     | 2,0                 | 0.3; 6.0   | 100            | 69,0          | 0,0             |
| 69623   | PP                                                         |      | PB   | PB   | PB   | PB   | PB    | PB    | PB    | PB    | 9.3; 40.0      | 2,0                 | 0.3; 6.0   | 100            | 65,0          | 0,0             |
| 69783   | PB                                                         | PB   | PB   | PB   | PB   | PB   | PB    | PB    | PB    | PB    | 0.0; 0.0       | 3,0                 | 0.8; 7.6   | 100            | 56,0          | 0,0             |
| 69784   | PB                                                         | PB   | PB   | PB   | PB   | PB   | PB    | PB    | PB    | PB    | 0.0; 0.0       | 11,0                | 5.9; 18.1  | 100            | 60,0          | 0,0             |
| 69566   | PB                                                         | PB   | PB   | PB   | PB   | PB   | PB    | PB    | PB    | PB    | 0.0; 0.0       | 13,0                | 7.4; 20.5  | 100            | 72,0          | 0,0             |
| 69469   | PB                                                         | PB   | PB   | PB   | PB   | PB   | PB    | PB    | PB    | PB    | 0.0; 0.0       | 16,0                | 9.7; 24.0  | 100            | 56,0          | 0,0             |
| 69565   | PB                                                         | PB   | PB   | PB   | PB   | PB   | PB    | PB    | PB    | PB    | 0.0; 0.0       | 16,0                | 9.7; 24.0  | 100            | 68,0          | 0,0             |
| 69625   | PB                                                         | PB   | PB   | PB   | PB   | PB   | PB    | PB    | PB    | PB    | 0.0; 0.0       | 16,0                | 9.7; 24.0  | 100            | 65,0          | 0,0             |
| 69624   | PB                                                         | PB   | PB   | PB   | PB   | PB   | PB    | PB    | PB    | PB    | 0.0; 0.0       | 19,0                | 12.1; 27.4 | 100            | 59,0          | 0,0             |
| 69746   | PB                                                         | PB   | PB   | PB   | PB   | PB   | PB    | PB    | PB    | PB    | 0.0; 0.0       | 21,0                | 13.8; 29.7 | 100            | 62,0          | 0,0             |
| 69743   | PB                                                         | PB   | PB   | PB   | PB   | PB   | PB    | PB    | PB    | PB    | 0.0; 0.0       | 21,0                | 13.8; 29.7 | 100            | 65,0          | 0,0             |
| 69781   | PB                                                         | PB   | PB   | PB   | PB   | PB   | PB    |       | PP    | PP    | 1.2; 2.1       | 24,0                | 16.4; 33.0 | 100            | 62,0          | 0,0             |
| 69878   | PB                                                         | PB   | PB   | PB   | PB   | PB   | PB    |       | PP    | PP    | 1.2; 2.1       | 23,0                | 15.5; 31.9 | 100            | 65,0          | 0,0             |
| 69782   | PB                                                         | PB   | PB   | PB   | PB   | PB   | PB    |       | PP    | PP    | 1.2; 2.1       | 16,0                | 9.7; 24.0  | 100            | 58,0          | 0,0             |
| 69879   | PB                                                         | PB   | PB   | PB   |      | PP   | PP    | PP    | PP    | PP    | 6.2; 7.0       | 0,0                 | 0.0; 2.0   | 100            | 58,0          | 0,0             |

The minimal and maximal length of PWD/PWD interval was determined by positions of the DNA markers used for genotyping. White and orange intervals are heterozygous PWD/B6 and homozygous PWD/PWD, respectively. Recombination breaks are located in gray intervals.

Sperm count refers to the number of sperm cells in both epididymis, TW is the wet weight of paired testes in milligrams.



Table supplement 7. Two-chr cross. The effect of the size and location of PWD/PWD conspecific intervals on asynapsis of Chr 17 and on fertility parameters.

| Male ID | Distance from centromere of Chr 17 (total length 95.0 Mb) |    |      |      |      |      |      |      |      |      | PWD/PWD length |      | Asynapsis of Chr 17 |     | Cells analyzed | Testes weight   | Sperm count |
|---------|-----------------------------------------------------------|----|------|------|------|------|------|------|------|------|----------------|------|---------------------|-----|----------------|-----------------|-------------|
|         | 4,8                                                       | 15 | 15,6 | 30,9 | 34,7 | 45,4 | 52,7 | 65,3 | 73,8 | 93,2 | Mb, range      | %    | 95% CI              | N   | mg             | 10 <sup>6</sup> |             |
| 64979   | PB                                                        | PB | PB   | PB   | PB   | PB   | PB   | PB   | PB   | PB   | 0.0; 0.0       | 18,8 | 12.0; 27.1          | 101 | 72,0           | 0,0             |             |
| 66707   | PB                                                        | PB | PB   | PB   | PB   | PB   | PB   | PB   | PB   | PB   | 0.0; 0.0       | 14,9 | 8.9; 22.7           | 101 | 63,0           | 0,0             |             |
| 64855   | PB                                                        | PB | PB   | PB   | PB   | PB   | PB   | PB   | PB   | PB   | 0.0; 0.0       | 14,9 | 8.9; 22.7           | 101 | 73,0           | 0,0             |             |
| 66954   | PB                                                        | PB | PB   | PB   | PB   | PB   | PB   | PB   | PB   | PB   | 0.0; 0.0       | 14,6 | 8.7; 22.3           | 103 | 71,0           | 0,0             |             |
| 64574   | PB                                                        | PB | PB   | PB   | PB   | PB   | PB   | PB   | PB   | PB   | 0.0; 0.0       | 11,7 | 6.5; 18.8           | 103 | 68,0           | 0,0             |             |
| 64977   | PB                                                        | PB | PB   | PB   | PB   | PB   | PB   | PB   | PB   | PB   | 0.0; 0.0       | 11,2 | 6.3; 17.8           | 116 | 63,0           | 0,0             |             |
| 64718   | PB                                                        | PB | PB   | PB   | PB   | PB   | PB   | PB   | PB   | PB   | 0.0; 0.0       | 12,5 | 6.9; 20.1           | 96  | 68,0           | 0,0             |             |
| 64849   | PB                                                        | PB | PB   | PB   | PB   | PB   | PB   | PB   | PB   | PB   | 0.0; 0.0       | 7,0  | 3.1; 13.0           | 102 | 76,0           | 0,0             |             |
| 66515   | PB                                                        | PB | PB   | PB   | PB   | PB   | PB   | PB   |      | PP   | 1.8; 21.2      | 16,0 | 9.5; 24.4           | 92  | 75,0           | 0,0             |             |
| 66514   | PB                                                        | PB | PB   | PB   | PB   | PB   | PB   | PB   |      | PP   | 1.8; 21.2      | 14,0 | 8.1; 21.7           | 100 | 71,0           | 0,0             |             |
| 64851   | PB                                                        | PB | PB   | PB   | PB   | PB   | PB   | PB   |      | PP   | 1.8; 21.2      | 10,5 | 5.6; 17.3           | 105 | 69,0           | 0,0             |             |
| 64719   | PB                                                        | PB | PB   | PB   | PB   | PB   | PB   | PB   |      | PP   | 1.8; 21.2      | 5,8  | 2.4; 11.3           | 106 | 62,0           | 0,0             |             |
| 66819   | PB                                                        | PB | PB   | PB   | PB   | PB   | PB   | PB   |      | PP   | 1.8; 21.2      | 3,4  | 0.9; 8.2            | 100 | 72,0           | 0,0             |             |
| 66813   | PB                                                        | PB | PB   | PB   | PB   | PB   |      |      | PP   | PP   | 21.2; 29.7     | 1,0  | 0.1; 4.2            | 104 | 68,0           | 0,0             |             |
| 66876   | PB                                                        | PB | PB   | PB   | PB   |      |      | PP   | PP   | PP   | 29.7; 42.3     | 0,0  | 0.0; 2.0            | 97  | 58,0           | 0,0             |             |
| 64575   | PB                                                        | PB | PB   | PB   | PB   |      |      | PP   | PP   | PP   | 42.3; 49.6     | 0,0  | 0.0; 1.9            | 103 | 73,0           | 0,0             |             |
| 64922   | PB                                                        | PB | PB   | PB   | PB   |      |      | PP   | PP   | PP   | 42.3; 49.6     | 2,8  | 0.7; 7.1            | 108 | 69,0           | 0,0             |             |
| 64975   | PP                                                        |    | PB   | PB   | PB   | PB   | PB   | PB   | PB   | PB   | 4.8; 15.0      | 7,9  | 3.7; 14.2           | 101 | 80,0           | 0,0             |             |
| 66532   | PP                                                        |    | PB   | PB   | PB   | PB   | PB   | PB   | PB   | PB   | 4.8; 15.0      | 6,0  | 2.4; 11.8           | 100 | 72,0           | 0,0             |             |

The minimal and maximal length of PWD/PWD interval was determined by positions of the DNA markers used for genotyping. White and orange intervals are heterozygous PWD/B6 and homozygous PWD/PWD, respectively. Recombination breaks are located in gray intervals.

Table supplement 8. Two-chr cross. The effect of the size and location of PWD/PWD conspecific intervals on asynapsis of Chr 18 and on fertility para

| Male ID | Distance from centromere of Chr 18 (90.7 Mb) |      |      |      |      | PWD/PWD length | Asynapsis of Chr 18 |            | Cells analyzed | Testes weight | Sperm count     |
|---------|----------------------------------------------|------|------|------|------|----------------|---------------------|------------|----------------|---------------|-----------------|
|         | 3,8                                          | 25,0 | 57,4 | 76,9 | 89,6 | Mb, range      | %                   | 95% CI     | N              | mg            | 10 <sup>6</sup> |
| 64574   | PB                                           | PB   | PB   | PB   | PB   | 0.0; 0.0       | 30,8                | 22.5; 40.1 | 104            | 68,0          | 0,0             |
| 64851   | PB                                           | PB   | PB   | PB   | PB   | 0.0; 0.0       | 21,4                | 14.2; 30.0 | 103            | 69,0          | 0,0             |
| 64719   | PB                                           | PB   | PB   | PB   | PB   | 0.0; 0.0       | 19,3                | 12.7; 27.4 | 109            | 62,0          | 0,0             |
| 64976   | PB                                           | PB   | PB   |      | PP   | 1.1; 13.8      | 28,0                | 19.8; 37.3 | 100            | 71,0          | 0,0             |
| 66876   | PB                                           | PB   |      | PP   | PP   | 13.8; 33.3     | 9,4                 | 3.9; 18.1  | 64             | 58,0          | 0,0             |
| 66877   | PB                                           | PB   |      | PP   | PP   | 13.8; 33.3     | 1,0                 | 0.1; 4.3   | 101            | 64,0          | 0,0             |
| 66532   | PB                                           | PB   |      | PP   | PP   | 13.8; 33.3     | 0,0                 | 0.0; 2.5   | 78             | 72,0          | 0,0             |
| 66954   | PB                                           |      | PP   | PP   | PP   | 33.3; 65.7     | 0,0                 | 0.0; 1.9   | 102            | 71,0          | 0,0             |
| 66813   | PB                                           |      | PP   | PP   | PP   | 33.3; 65.7     | 0,0                 | 0.0; 1.7   | 113            | 68,0          | 0,0             |
| 64922   | PP                                           | PP   | PP   | PP   | PP   | 90.7; 90.7     | 1,8                 | 0.3; 5.5   | 109            | 69,0          | 0,0             |
| 64718   | PP                                           | PP   | PP   | PP   | PP   | 90.7; 90.7     | 0,0                 | 0.0; 2.0   | 100            | 68,0          | 0,0             |
| 64975   | PP                                           | PP   | PP   | PP   | PP   | 90.7; 90.7     | 0,0                 | 0.0; 2.0   | 100            | 80,0          | 0,0             |
| 64855   | PP                                           | PP   | PP   | PP   |      | 76.9; 89.6     | 0,0                 | 0.0; 1.9   | 103            | 73,0          | 0,0             |
| 64849   | PP                                           | PP   | PP   | PP   |      | 76.9; 89.6     | 0,0                 | 0.0; 2.0   | 100            | 76,0          | 0,0             |
| 64575   | PP                                           | PP   | PP   | PP   |      | 76.9; 89.6     | 2,0                 | 0.3; 6.0   | 101            | 73,0          | 0,0             |
| 64968   | PP                                           | PP   | PP   | PP   |      | 76.9; 89.6     | 3,0                 | 0.8; 7.6   | 101            | 73,0          | 0,0             |
| 64979   | PP                                           | PP   | PP   |      | PB   | 57.4; 76.9     | 1,0                 | 0.1; 4.3   | 100            | 72,0          | 0,0             |
| 66872   | PP                                           | PP   | PP   |      | PB   | 57.4; 76.9     | 2,0                 | 0.3; 6.0   | 103            | 73,0          | 0,0             |
| 66514   | PP                                           | PP   | PP   |      | PB   | 57.4; 76.9     | 3,0                 | 0.8; 7.6   | 100            | 71,0          | 0,0             |
| 64977   | PP                                           | PP   |      | PB   | PB   | 25.0; 57.4     | 4,8                 | 1.7; 10.0  | 104            | 63,0          | 0,0             |
| 66707   | PP                                           |      | PB   | PB   | PB   | 3.8; 25.0      | 4,9                 | 1.8; 10.2  | 103            | NA            | 0,0             |
| 66815   | PP                                           |      | PB   | PB   | PB   | 3.8; 25.0      | 11,0                | 6.0; 17.8  | 109            | 75,0          | 0,0             |

The minimal and maximal length of PWD/PWD interval was determined by positions of the DNA markers used for genotyping. White and orange intervals are heterozygous PWD/B6 and homozygous PWD/PWD, respectively. Recombination breaks are located in gray intervals.

Sperm count refers to the number of sperm cells in both epididymis, TW is the wet weight of paired testes in milligrams.

Table supplement 9. Change point estimates of the minimal length [Mb] of PWD/PWD homozygosity showing detectable effect on asynapsis rate

| Chr#               | Experiment                | <sup>1</sup> Change point estimate | <sup>2</sup> Change point lower bound | <sup>3</sup> Change point upper bound |
|--------------------|---------------------------|------------------------------------|---------------------------------------|---------------------------------------|
| Chr5               | 2-chr cross               | 19,50                              | 14,57                                 | 24,44                                 |
| Chr7               | 2-chr cross               | <sup>4</sup> NA                    | NA                                    | NA                                    |
| Chr12              | 2-chr cross               | 20,87                              | 6,80                                  | 34,95                                 |
| Chr15              | 2-chr cross               | 8,61                               | -2,87                                 | 20,09                                 |
| Chr17              | 2-chr cross               | 29,31                              | 10,29                                 | 48,33                                 |
| Chr18              | 2-chr cross               | 25,32                              | 19,68                                 | 30,96                                 |
| Chr15              | 4-chr cross               | <sup>5</sup> 2.00                  | 0,71                                  | 3,29                                  |
| Chr16              | 4-chr cross               | 12,80                              | 8,43                                  | 17,16                                 |
| Chr18              | 4-chr cross               | 33,42                              | 10,80                                 | 56,04                                 |
| Chr19              | 4-chr cross               | 19,16                              | 12,26                                 | 26,06                                 |
| Chr15              | 2-chr cross & 4-chr cross | 7,32                               | 1,54                                  | 13,10                                 |
| Chr18              | 2-chr cross & 4-chr cross | 27,13                              | 21,32                                 | 32,94                                 |
| Chr5,7,12,15,17,18 | 2-chr cross               | 27,14                              | 19,36                                 | 34,91                                 |
| Chr5,7,12,15-19    | 2-chr cross & 4-chr cross | 28,40                              | 23,18                                 | 33,63                                 |

<sup>1</sup>Change point estimate of the length [Mb] of PWD/PWD homozygosity in the piecewise linear regression model. For the lengths of PWD/PWD homozygosity greater than the change point, the asynapsis rate is modelled as constant.

<sup>2</sup>Lower bound of 95% CI.

<sup>3</sup>Upper bound of 95% CI.

<sup>4</sup>Change point cannot be determined.

<sup>5</sup>The estimate is influenced by two outliers with mouse ID 38759 and 38737.

Table supplement 10. Eleven G3 male parents selected for the 4-Chr cross experiment

| Male ID | Chr 15 (104 Mb) |      |      |      |       | Chr 16 (98,2 Mb) |      |      |      |      |      | Chr 18 (90,7 Mb) |      |      |      |      | Chr 19 (61,4 Mb) |      |      |      |      |
|---------|-----------------|------|------|------|-------|------------------|------|------|------|------|------|------------------|------|------|------|------|------------------|------|------|------|------|
|         | 9,3             | 39,9 | 63,3 | 70,0 | 103,3 | 6,2              | 20,2 | 29,3 | 42,7 | 67,6 | 97,0 | 3,8              | 34,0 | 45,1 | 57,6 | 89,7 | 3,3              | 21,9 | 33,0 | 42,4 | 59,7 |
| 37487   | PB              | PB   | PB   | PB   | PB    | B                | B    | PB   | PB   | PB   | PB   | PB               | PB   | PB   | PB   | PB   | PB               | PB   | PB   | PB   | PB   |
| 37504   | B               | PB   | PB   | PB   | PB    | PB               | PB   | PB   | PB   | PB   | B    | PB               | PB   | PB   | PB   | PB   | B                | PB   | PB   | PB   | PB   |
| 37507   | B               | B    | PB   | PB   | PB    | PB               | PB   | B    | B    | B    | B    | PB               | PB   | B    | B    | B    | PB               | PB   | PB   | PB   | PB   |
| 37715   | PB              | PB   | PB   | PB   | PB    | PB               | PB   | PB   | PB   | PB   | PB   | B                | PB   | PB   | PB   | PB   | PB               | PB   | PB   | PB   | PB   |
| 37852   | PB              | PB   | PB   | PB   | PB    | PB               | PB   | PB   | PB   | PB   | PB   | PB               | PB   | PB   | PB   | B    | PB               | PB   | PB   | PB   | PB   |
| 37871   | PB              | PB   | PB   | PB   | PB    | PB               | PB   | PB   | PB   | PB   | B    | PB               | PB   | PB   | PB   | PB   | PB               | PB   | PB   | PB   | PB   |
| 37746   | PB              | PB   | PB   | PB   | PB    | PB               | PB   | PB   | PB   | PB   | PB   | B                | PB   | PB   | PB   | B    | PB               | PB   | PB   | PB   | PB   |
| 37634   | B               | B    | B    | PB   | PB    | PB               | PB   | PB   | PB   | PB   | PB   | PB               | PB   | PB   | PB   | PB   | PB               | PB   | PB   | PB   | PB   |
| 37616   | PB              | PB   | PB   | PB   | PB    | B                | PB   | PB   | PB   | PB   | PB   | B                | B    | PB   | PB   | PB   | PB               | PB   | PB   | PB   | PB   |
| 37709   | B               | B    | B    | PB   | PB    | PB               | PB   | PB   | PB   | PB   | PB   | PB               | PB   | PB   | PB   | PB   | PB               | PB   | PB   | PB   | PB   |
| 37862   | PB              | PB   | PB   | PB   | PB    | PB               | PB   | PB   | PB   | B    | B    | PB               | PB   | PB   | PB   | PB   | PB               | PB   | PB   | PB   | B    |

PB - PWD/B6 heterozygosity

B - B6/B6 homozygosity

Table supplement 11. The fertility parameters of hybrids of the 4-chr cross experiment

| Male ID | TW (mg) | Sperm x 10 <sup>6</sup> |
|---------|---------|-------------------------|
| 38754   | 51      | 0,00                    |
| 38428   | 57      | 0,00                    |
| 38735   | 58      | 0,00                    |
| 38088   | 59      | 0,00                    |
| 38089   | 60      | 0,00                    |
| 38753   | 60      | 0,00                    |
| 38726   | 61      | 0,00                    |
| 38751   | 61      | 0,00                    |
| 38755   | 61      | 0,00                    |
| 38435   | 62      | 0,00                    |
| 38090   | 63      | 0,00                    |
| 38085   | 64      | 0,00                    |
| 38087   | 64      | 0,00                    |
| 38448   | 64      | 0,00                    |
| 38738   | 65      | 0,00                    |
| 38739   | 65      | 0,00                    |
| 38711   | 65      | 0,00                    |
| 38728   | 65      | 0,00                    |
| 38822   | 65      | 0,00                    |
| 38430   | 66      | 0,00                    |
| 38432   | 66      | 0,00                    |
| 38710   | 66      | 0,00                    |
| 38084   | 67      | 0,00                    |
| 38434   | 67      | 0,00                    |
| 38814   | 67      | 0,00                    |
| 38752   | 68      | 0,00                    |
| 38783   | 68      | 0,00                    |
| 38817   | 68      | 0,00                    |
| 38758   | 69      | 0,00                    |
| 38821   | 69      | 0,00                    |
| 38740   | 70      | 0,00                    |
| 38766   | 70      | 0,00                    |
| 38813   | 70      | 0,00                    |
| 38426   | 71      | 0,00                    |
| 38468   | 71      | 0,00                    |
| 38765   | 72      | 0,00                    |
| 38767   | 73      | 0,00                    |
| 38819   | 73      | 0,00                    |
| 38792   | 74      | 0,00                    |
| 38818   | 74      | 0,00                    |
| 38820   | 74      | 0,00                    |
| 38815   | 75      | 0,00                    |
| 75890   | 68      | 0,00                    |
| 79414   | 65      | 0,00                    |
| 38712   | 76      | 0,00                    |
| 38733   | 73      | 0,01                    |
| 38732   | 63      | 0,01                    |
| 38561   | 78      | 0,01                    |
| 38713   | 77      | 0,03                    |
| 38727   | 62      | 0,03                    |
| 38757   | 72      | 0,04                    |
| 38427   | 64      | 0,06                    |
| 38429   | 64      | 0,09                    |
| 38425   | 73      | 0,10                    |
| 38566   | 63      | 0,17                    |
| 38734   | 66      | 0,21                    |
| 38086   | 73      | 0,23                    |
| 38725   | 69      | 0,29                    |
| 38852   | 75      | 0,34                    |
| 38842   | 89      | 0,43                    |
| 38759   | 81      | 0,60                    |
| 38858   | 73      | 0,74                    |
| 38763   | 81      | 1,02                    |
| 38736   | 81      | 1,10                    |
| 38764   | 84      | 1,10                    |
| 38741   | 81      | 1,20                    |
| 38801   | 83      | 1,51                    |
| 38565   | 70      | 1,61                    |
| 38794   | 90      | 1,80                    |
| 38737   | 94      | 1,90                    |
| 75889   | 90      | 2,10                    |
| 38692   | 89      | 2,20                    |
| 79415   | 83      | 2,20                    |
| 38724   | 71      | 2,80                    |
| 79417   | 90      | 2,80                    |
| 79412   | 103     | 3,90                    |
| 38433   | 78      | 4,20                    |
| 38816   | 106     | 4,20                    |
| 38756   | 85      | 4,70                    |
| 38650   | 82      | 5,40                    |
| 38652   | 90      | 5,60                    |
| 38431   | 81      | 6,40                    |
| 79416   | 95      | 6,40                    |
| 38555   | 98      | 6,87                    |
| 38793   | 117     | 10,20                   |
| 75891   | 131     | 12,40                   |
| 79413   | 108     | 13,70                   |

Table supplement 12. Four-chr cross. The effect of the size and location of PWD/PWD consubspecific intervals on asynapsis of Chrs 15, 16, 18 and 19 and on fertility parameters.

| Male ID | Distance from the centromere of Chr 15 <sup>1</sup><br>(total length 104.0 Mb) |      |      |      |      |      |      |       |       |      | Asynapsis of Chr 15 |     |      |      |      | Distance from the centromere of Chr 16<br>(total length 98.2 Mb) |      |      |            |        | Asynapsis of Chr 16 |      |      |      |      | Dist. from the centromere of Chr 18<br>(total length 90.7 Mb) |        |     |      |      | Asynapsis of Chr 18 |      |            |        |                    | Dist. from the centromere of Chr 19<br>(total length 61.4 Mb) |    |    |    |    | Asynapsis of Chr 19 |    |    |    |  | Sperm count <sup>2</sup><br>10 <sup>6</sup> | Cells analyzed in<br>Chrs 15, 16, 18, 19<br>N | PWD/PWD length <sup>3</sup> in<br>Chrs 15, 16, 18, 19<br>Mb, middle length |
|---------|--------------------------------------------------------------------------------|------|------|------|------|------|------|-------|-------|------|---------------------|-----|------|------|------|------------------------------------------------------------------|------|------|------------|--------|---------------------|------|------|------|------|---------------------------------------------------------------|--------|-----|------|------|---------------------|------|------------|--------|--------------------|---------------------------------------------------------------|----|----|----|----|---------------------|----|----|----|--|---------------------------------------------|-----------------------------------------------|----------------------------------------------------------------------------|
|         | 9,3                                                                            | 39,9 | 50,4 | 63,3 | 65,1 | 70,0 | 83,9 | 100,9 | 103,3 | %    | 95% CI              | 6,2 | 14,0 | 29,3 | 39,1 | 42,7                                                             | 67,6 | 97,0 | %          | 95% CI | 3,8                 | 34,0 | 45,1 | 57,6 | 89,7 | %                                                             | 95% CI | 3,0 | 21,9 | 33,0 | 42,4                | 59,7 | %          | 95% CI |                    |                                                               |    |    |    |    |                     |    |    |    |  |                                             |                                               |                                                                            |
|         | PP                                                                             | PP   | PP   | PP   | PP   | PP   | PP   | PP    | PP    | PP   | PB                  | PB  | PB   | PB   | PB   | PB                                                               | PB   | PB   | PP         | PP     | PP                  | PP   | PP   | PP   | PB   | PB                                                            | PB     | PB  | PB   | PB   | PB                  | PB   | PP         | PP     | PP                 | PP                                                            | PP | PP | PB | PB | PB                  | PB | PB | PB |  |                                             |                                               |                                                                            |
| 75890   | PP                                                                             | PP   | PP   | PP   | PP   | PP   | PP   | PP    | PP    | 1,7  | 0.1; 7.3            | PB  | PB   | PP   | PP   | PP                                                               | PP   | 1,7  | 0.1; 8.5   | PB     | PB                  | PB   | PB   | PB   | 20,6 | 13.7; 28.9                                                    | PB     | PB  | PB   | PB   | PB                  | 24,1 | 14.2; 36.3 | 0,0    | 59; 45; 107; 56    | 104.0; 60.6; 0.0; 0.0                                         |    |    |    |    |                     |    |    |    |  |                                             |                                               |                                                                            |
| 79414   | PP                                                                             | PP   | PP   | PP   | PP   | PP   | PP   | PB    | PB    | 2,1  | 0.3; 6.4            | PB  | PB   | PB   | PB   | PB                                                               | PB   | 16,7 | 10.5; 24.5 | PB     | PB                  | PB   | PB   | PB   | 28,1 | 17.6; 40.6                                                    | PB     | PB  | PB   | PB   | PB                  | 26,0 | 17.9; 35.3 | 0,0    | 94; 108; 57; 96    | 77.0; 0.0; 0.0; 0.0                                           |    |    |    |    |                     |    |    |    |  |                                             |                                               |                                                                            |
| 38435   | PB                                                                             | PB   | PB   | PB   | PB   | PB   | PB   | PB    | PB    | 25,0 | 17.2; 34.0          | PP  | PP   | PP   | PP   | PP                                                               | PP   | 4,0  | 1.3; 9.0   | PB     | PB                  | PB   | PB   | PB   | 39,0 | 29.8; 48.7                                                    | PB     | PB  | PB   | PB   | PB                  | 33,0 | 24.3; 42.6 | 0,0    | 100; 100; 100; 100 | 0.0; 34.2; 0.0; 0.0                                           |    |    |    |    |                     |    |    |    |  |                                             |                                               |                                                                            |
| 38087   | PB                                                                             | PB   | PB   | PB   | PB   | PB   | PB   | PB    | PB    | 14,0 | 8.1; 21.7           | PB  | PB   | PB   | PB   | PB                                                               | PB   | 11,0 | 5.9; 18.1  | PB     | PB                  | PB   | PB   | PB   | 18,0 | 11.3; 26.3                                                    | PP     | PP  | PP   | PP   | PP                  | 10,0 | 4.9; 17.3  | 0,0    | 100; 100; 100; 90  | 0.0; 0.0; 0.0; 12.5                                           |    |    |    |    |                     |    |    |    |  |                                             |                                               |                                                                            |
| 38432   | PB                                                                             | PB   | PB   | PB   | PP   | PP   | PP   | PP    | PP    | 0,0  | 0.0; 2.0            | PB  | PB   | PB   | PB   | PB                                                               | PB   | 19,0 | 12.1; 27.4 | PP     | PP                  | PP   | PP   | PP   | 0,0  | 0.0; 2.0                                                      | PB     | PB  | PB   | PB   | PB                  | 36,0 | 27.0; 45.7 | 0,0    | 100; 100; 100; 100 | 36.5; 0.0; 90.7; 0.0                                          |    |    |    |    |                     |    |    |    |  |                                             |                                               |                                                                            |
| 38425   | PP                                                                             | PP   | PP   | PP   | PP   | PP   | PP   | PB    | PB    | 0,0  | 0.0; 2.0            | PP  | PP   | PP   | PP   | PP                                                               | PP   | 0,0  | 0.0; 2.0   | PP     | PP                  | PP   | PP   | PP   | 1,0  | 0.1; 4.3                                                      | PB     | PB  | PB   | PB   | PB                  | 23,0 | 15.5; 31.9 | 0,1    | 100; 100; 100; 100 | 77.0; 55.1; 71.7; 0.0                                         |    |    |    |    |                     |    |    |    |  |                                             |                                               |                                                                            |
| 38086   | PB                                                                             | PB   | PP   | PP   | PP   | PP   | PP   | PP    | PP    | 2,0  | 0.3; 6.0            | PP  | PP   | PB   | PB   | PB                                                               | PB   | 4,0  | 1.3; 9.0   | PP     | PP                  | PP   | PB   | PB   | 1,0  | 0.1; 4.3                                                      | PP     | PP  | PP   | PP   | PP                  | 0,0  | 0.0; 2.0   | 0,2    | 100; 100; 100; 100 |                                                               |    |    |    |    |                     |    |    |    |  |                                             |                                               |                                                                            |
| 38759   | PB                                                                             | PB   | PB   | PB   | PB   | PB   | PB   | PP    | PP    | 2,6  | 0.4; 7.8            | PB  | PB   | PB   | PP   | PP                                                               | PP   | 0,0  | 0.0; 2.0   | PB     | PB                  | PB   | PB   | PB   | 15,0 | 8.9; 22.8                                                     | PP     | PP  | PP   | PP   | PP                  | 0,0  | 0.0; 2.0   | 0,6    | 78; 100; 100; 100  | 1.9; 57.3; 0.0; 61.4                                          |    |    |    |    |                     |    |    |    |  |                                             |                                               |                                                                            |
| 38736   | PP                                                                             | PP   | PB   | PB   | PB   | PB   | PP   | PP    | PP    | 4,0  | 1.3; 9.0            | PB  | PB   | PB   | PB   | PB                                                               | PB   | 18,0 | 11.3; 26.3 | PB     | PB                  | PP   | PP   | PP   | 8,0  | 3.7; 14.4                                                     | PP     | PP  | PP   | PP   | PB                  | 0,0  | 0.0; 3.0   | 1,1    | 100; 100; 100; 65  | 36.2; 0.0; 22.5; 37.5                                         |    |    |    |    |                     |    |    |    |  |                                             |                                               |                                                                            |
| 38741   | PP                                                                             | PP   | PB   | PB   | PB   | PB   | PB   | PB    | PB    | 5,0  | 1.8; 10.4           | PB  | PP   | PP   | PP   | PP                                                               | PP   | 1,0  | 0.1; 4.3   | PP     | PP                  | PP   | PP   | PP   | 0,0  | 0.0; 2.0                                                      | PB     | PP  | PP   | PP   | PP                  | 2,3  | 0.4; 6.5   | 1,2    | 100; 100; 100; 100 | 24.0; 10.0; 14.0; 33.0                                        |    |    |    |    |                     |    |    |    |  |                                             |                                               |                                                                            |
| 38737   | PB                                                                             | PB   | PB   | PB   | PP   | PP   | PP   | PB    | PB    | 1,0  | 0.1; 4.3            | PB  | PB   | PB   | PB   | PB                                                               | PB   | 18,0 | 11.3; 26.3 | PP     | PP                  | PP   | PP   | PP   | 0,0  | 0.0; 2.0                                                      | PP     | PP  | PP   | PP   | PP                  | 0,0  | 0.0; 2.0   | 1,9    | 100; 100; 100; 100 | 9.4; 0.0; 90.7; 61.4                                          |    |    |    |    |                     |    |    |    |  |                                             |                                               |                                                                            |
| 38692   | PB                                                                             | PB   | PB   | PB   | PB   | PB   | PB   | PB    | PB    | 8,0  | 3.7; 14.4           | PB  | PB   | PB   | PP   | PP                                                               | PP   | 0,0  | 0.0; 2.0   | PB     | PP                  | PP   | PP   | PP   | 0,0  | 0.0; 2.0                                                      | PP     | PP  | PP   | PP   | PP                  | 0,0  | 0.0; 2.0   | 2,2    | 100; 100; 100; 100 | 0.0; 41.4; 51.2; 61.4                                         |    |    |    |    |                     |    |    |    |  |                                             |                                               |                                                                            |
| 38433   | PP                                                                             | PP   | PP   | PP   | PP   | PP   | PP   | PB    | PB    | 0,0  | 0.0; 2.0            | PP  | PP   | PP   | PP   | PP                                                               | PP   | 0,0  | 0.0; 2.0   | PP     | PP                  | PP   | PP   | PP   | 0,0  | 0.0; 2.0                                                      | PP     | PP  | PP   | PP   | PP                  | 0,0  | 0.0; 2.0   | 4,2    | 100; 100; 100; 100 | 11.0; 20.4; 22.0; 31.0                                        |    |    |    |    |                     |    |    |    |  |                                             |                                               |                                                                            |
| 38756   | PB                                                                             | PB   | PB   | PB   | PB   | PB   | PB   | PB    | PB    | 13,0 | 7.4; 20.5           | PP  | PP   | PP   | PP   | PP                                                               | PP   | 0,0  | 0.0; 2.0   | PP     | PP                  | PP   | PP   | PP   | 0,0  | 0.0; 2.0                                                      | PP     | PP  | PP   | PP   | PP                  | 0,0  | 0.0; 2.0   | 4,7    | 100; 100; 100; 100 | 0.0; 98.2; 74.0; 48.9                                         |    |    |    |    |                     |    |    |    |  |                                             |                                               |                                                                            |
| 38650   | PP                                                                             | PP   | PB   | PB   | PB   | PB   | PB   | PB    | PB    | 2,0  | 0.3; 6.0            | PP  | PP   | PP   | PP   | PP                                                               | PP   | 0,0  | 0.0; 2.0   | PP     | PP                  | PP   | PP   | PP   | 0,0  | 0.0; 2.0                                                      | PP     | PP  | PP   | PP   | PP                  | 0,0  | 0.0; 2.0   | 5,4    | 100; 100; 100; 100 | 24.0; 30.4; 33.0; 33.0                                        |    |    |    |    |                     |    |    |    |  |                                             |                                               |                                                                            |
| 38652   | PB                                                                             | PB   | PB   | PB   | PB   | PB   | PP   | PP    | PP    | 6,0  | 2.4; 11.8           | PP  | PP   | PP   | PP   | PP                                                               | PP   | 0,0  | 0.0; 2.0   | PP     | PP                  | PP   | PP   | PP   | 0,0  | 0.0; 2.2                                                      | PP     | PP  | PP   | PP   | PP                  | 0,0  | 0.0; 2.0   | 5,6    | 100; 100; 91; 100  | 11.0; 53.0; 33.0; 33.0                                        |    |    |    |    |                     |    |    |    |  |                                             |                                               |                                                                            |
| 38431   | PB                                                                             | PB   | PB   | PB   | PP   | PP   | PP   | PB    | PB    | 3,0  | 0.8; 7.6            | PP  | PP   | PP   | PP   | PP                                                               | PB   | 0,0  | 0.0; 2.0   | PP     | PP                  | PP   | PP   | PP   | 0,0  | 0.0; 2.0                                                      | PP     | PP  | PP   | PP   | PP                  | 0,0  | 0.0; 2.0   | 6,4    | 100; 100; 100; 100 | 24.0; 53.0; 30.0; 33.0                                        |    |    |    |    |                     |    |    |    |  |                                             |                                               |                                                                            |
| 38555   | PP                                                                             | PP   | PB   | PB   | PB   | PB   | PB   | PB    | PB    | 2,0  | 0.3; 6.0            | PB  | PP   | PP   | PP   | PP                                                               | PP   | 1,0  | 0.1; 4.3   | PB     | PP                  | PP   | PP   | PP   | 0,0  | 0.0; 2.0                                                      | PP     | PP  | PP   | PP   | PP                  | 0,0  | 0.0; 2.0   | 6,9    | 100; 100; 100; 100 | 40.4; 78.0; 31.4; 33.0                                        |    |    |    |    |                     |    |    |    |  |                                             |                                               |                                                                            |

<sup>1</sup>The minimal and maximal length of PWD/PWD interval was determined by positions of the DNA markers used for genotyping. White and orange intervals are heterozygous PWD/B6 and homozygous PWD/PWD, respectively. Recombination breaks are located in gray intervals.

<sup>2</sup>Sperm count refers to the number of sperm cells in both epididymis.

<sup>3</sup>The average between minimum and maximum PWD/PWD consubspecific sequence is given.

Table supplement 13. Four-chr cross experiment. The relation between observed and calculated rate of pachytene asynapsis and fertility parameters

| Male ID | Testes (mg) | Sperm No<br>$\times 10^{-6}$ | Frequency of Chr synapsed |       |       |       | Probability<br>of all 4 chr<br>synapsed | Probability<br>of all 19<br>synapsed | Probability<br>of asynaptic<br>pachy | Obs ratio of<br>asynaptic<br>pachy | Obs ratio of<br>all 19<br>synapsed |
|---------|-------------|------------------------------|---------------------------|-------|-------|-------|-----------------------------------------|--------------------------------------|--------------------------------------|------------------------------------|------------------------------------|
|         |             |                              | 15                        | 16    | 18    | 19    |                                         |                                      |                                      |                                    |                                    |
| 38435   | 62          | 0                            | 0,750                     | 0,960 | 0,610 | 0,670 | 0,294                                   | 0,079                                | 0,921                                | 0,790                              | 0,210                              |
| 38087   | 64          | 0                            | 0,860                     | 0,890 | 0,820 | 0,900 | 0,565                                   | 0,151                                | 0,849                                | 0,610                              | 0,390                              |
| 75414   | 65          | 0                            | 0,979                     | 0,820 | 0,719 | 0,740 | 0,427                                   | 0,114                                | 0,886                                | 0,660                              | 0,340                              |
| 38432   | 66          | 0                            | 1,000                     | 0,810 | 1,000 | 0,640 | 0,518                                   | 0,138                                | 0,862                                | 0,650                              | 0,350                              |
| 75890   | 68          | 0                            | 0,983                     | 0,959 | 0,793 | 0,759 | 0,567                                   | 0,151                                | 0,849                                | 0,630                              | 0,370                              |
| 38425   | 73          | 0,1                          | 1,000                     | 1,000 | 0,990 | 0,770 | 0,762                                   | 0,204                                | 0,796                                | 0,580                              | 0,420                              |
| 38086   | 73          | 0,23                         | 0,980                     | 0,960 | 0,990 | 1,000 | 0,931                                   | 0,249                                | 0,751                                | 0,360                              | 0,640                              |
| 38759   | 81          | 0,6                          | 0,970                     | 1,000 | 0,850 | 1,000 | 0,825                                   | 0,220                                | 0,780                                | 0,490                              | 0,510                              |
| 38736   | 81          | 1,1                          | 0,960                     | 0,820 | 0,920 | 1,000 | 0,724                                   | 0,193                                | 0,807                                | 0,480                              | 0,520                              |
| 38741   | 81          | 1,2                          | 0,950                     | 0,990 | 1,000 | 0,980 | 0,922                                   | 0,246                                | 0,754                                | 0,480                              | 0,520                              |
| 38737   | 94          | 1,9                          | 0,990                     | 0,820 | 1,000 | 1,000 | 0,812                                   | 0,217                                | 0,783                                | 0,400                              | 0,600                              |
| 38692   | 89          | 2,2                          | 0,920                     | 1,000 | 1,000 | 1,000 | 0,920                                   | 0,246                                | 0,754                                | 0,280                              | 0,720                              |
| 38433   | 78          | 4,2                          | 1,000                     | 1,000 | 1,000 | 1,000 | 1,000                                   | 0,267                                | 0,733                                | 0,280                              | 0,720                              |
| 38756   | 85          | 4,7                          | 0,870                     | 1,000 | 1,000 | 1,000 | 0,870                                   | 0,232                                | 0,768                                | 0,390                              | 0,610                              |
| 38650   | 82          | 5,4                          | 0,980                     | 1,000 | 1,000 | 1,000 | 0,980                                   | 0,262                                | 0,738                                | 0,360                              | 0,640                              |
| 38652   | 90          | 5,6                          | 0,940                     | 1,000 | 1,000 | 1,000 | 0,940                                   | 0,251                                | 0,749                                | 0,330                              | 0,670                              |
| 38431   | 81          | 6,4                          | 0,970                     | 1,000 | 1,000 | 1,000 | 0,970                                   | 0,259                                | 0,741                                | 0,460                              | 0,540                              |
| 38555   | 98          | 6,9                          | 0,980                     | 0,960 | 1,000 | 1,000 | 0,941                                   | 0,251                                | 0,749                                | 0,255                              | 0,745                              |

Table supplement 14. Selected SSLP markers polymorphic between B6 and PWD.

| Chr No. | SSLP marker | Mbp    |
|---------|-------------|--------|
| 5       | D5Mit346    | 4,88   |
| 5       | D5Mit49     | 5,20   |
| 5       | D5Mit178    | 9,83   |
| 5       | D5Mit349    | 24,97  |
| 5       | D5Mit386    | 28,10  |
| 5       | D5Mit106    | 44,99  |
| 5       | D5Mit302    | 61,43  |
| 5       | D5Mit303    | 64,10  |
| 5       | D5Mit277    | 107,06 |
| 5       | D5Mit136    | 118,73 |
| 5       | D5Mit138    | 125,10 |
| 5       | D5Mit140    | 126,95 |
| 5       | D5Mit59     | 127,72 |
| 5       | D5Mit63     | 132,13 |
| 5       | D5Mit326    | 137,43 |
| 5       | D5Mit102    | 151,35 |
| 7       | D7Mit21     | 3,27   |
| 7       | D7Mit191    | 18,89  |
| 7       | D7Mit180    | 24,63  |
| 7       | D7Mit265    | 25,68  |
| 7       | D7Mit246    | 30,30  |
| 7       | D7Mit31     | 87,49  |
| 7       | D7Mit66     | 119,89 |
| 7       | D7Mit71     | 131,03 |
| 7       | D7Mit259    | 144,76 |
| 12      | D12Mit37    | 5,37   |
| 12      | D12Mit215   | 7,61   |
| 12      | D12Mit49    | 15,71  |
| 12      | D12Mit11    | 22,39  |
| 12      | D12Mit136   | 30,17  |
| 12      | D12Mit147   | 35,72  |
| 12      | D12Mit285   | 54,65  |
| 12      | D12Mit118   | 91,51  |
| 12      | D12Mit7     | 103,40 |
| 12      | D12Mit20    | 113,36 |
| 15      | D15Mit175   | 9,27   |
| 15      | D15Mit130   | 20,81  |
| 15      | D15Mit9     | 26,04  |
| 15      | D15Mit138   | 40,03  |
| 15      | D15Mit113   | 50,40  |
| 15      | D15Mit270   | 63,52  |
| 15      | D15Mit234   | 65,07  |
| 15      | D15Mit67    | 70,20  |
| 15      | D15Mit215   | 83,89  |
| 15      | D15Mit161   | 97,01  |
| 15      | D15Mit43    | 97,99  |
| 15      | D15Mit97    | 100,80 |
| 15      | D15Mit40    | 102,03 |
| 15      | D15Mit16    | 102,99 |
| 15      | D15Mit79    | 103,47 |
| 16      | D16Mit55    | 6,24   |
| 16      | D16Mit165   | 14,00  |
| 16      | D16Mit29    | 20,20  |
| 16      | D16Mit57    | 29,30  |
| 16      | D16Mit12    | 39,12  |
| 16      | D16Mit83    | 42,81  |
| 16      | D16Mit76    | 67,72  |
| 16      | D16Mit71    | 96,91  |
| 17      | D17Mit19    | 4,81   |
| 17      | D17M334     | 15,00  |
| 17      | D17M634     | 15,60  |
| 17      | D17Mit81    | 30,90  |
| 17      | D17Mit33    | 34,74  |
| 17      | D17Mit50    | 45,36  |
| 17      | D17Mit139   | 52,66  |
| 17      | D17Mit152   | 65,34  |
| 17      | D17Mit93    | 73,80  |
| 17      | D17Mit122   | 83,06  |
| 17      | D17Mit155   | 84,50  |
| 17      | D17Mit123   | 93,20  |
| 18      | D18Mit66    | 3,84   |
| 18      | D18Mit22    | 24,95  |
| 18      | D18Mit84    | 33,83  |
| 18      | D18Mit70    | 34,85  |
| 18      | D18Mit149   | 45,00  |
| 18      | D18Mit53    | 52,83  |
| 18      | D18Mit55    | 53,16  |
| 18      | D18Mit54    | 53,43  |
| 18      | D18Mit124   | 57,46  |
| 18      | D18Mit184   | 66,82  |
| 18      | D18Mit209   | 66,97  |
| 18      | D18Mit185   | 69,03  |
| 18      | D18Mit7     | 76,85  |
| 18      | D18Mit25    | 89,57  |
| 19      | D19Mit32    | 3,28   |
| 19      | D19Mit61    | 15,53  |
| 19      | D19Mit128   | 17,25  |
| 19      | D19Mit96    | 21,84  |
| 19      | D19Mit46    | 32,94  |
| 19      | D19Mit11    | 42,40  |
| 19      | D19Mit71    | 59,60  |
